# Supplementary material
Source: PubMed Central journal article supplement (PMC6921930)
Supplement: NIHMS1015412-supplement-Supplemntal_Material.pdf [file NIHMS1015412-supplement-Supplemntal_Material.pdf]

# Supplementary File: Holiday Spending Analyses

Sara J. Weston <sup>1</sup>, Joe J. Gladstone <sup>2</sup>, Eileen K. Graham <sup>1</sup>, Daniel K. Mroczek <sup>1,3</sup>, David M. Condon <sup>1</sup>

This document contains both the planned and exploratory analyses for the Holiday Spending project. Analyses were pre-registered at OSF. The preregistration form can be found at [osf.io/ew4h5](https://osf.io/ew4h5). Additional project information can be found at [osf.io/7j9da](https://osf.io/7j9da).

## Contents

|          |                                                                                               |           |
|----------|-----------------------------------------------------------------------------------------------|-----------|
| <b>1</b> | <b>Data Cleaning</b>                                                                          | <b>2</b>  |
| 1.1      | Transformations and indices . . . . .                                                         | 3         |
| 1.2      | Calculate personality scores . . . . .                                                        | 5         |
| 1.2.1    | Average scores . . . . .                                                                      | 5         |
| 1.2.2    | Latent scores . . . . .                                                                       | 6         |
| 1.3      | Wide-form data set . . . . .                                                                  | 8         |
| 1.4      | Holiday season data set . . . . .                                                             | 9         |
| <b>2</b> | <b>Descriptive statistics</b>                                                                 | <b>10</b> |
| 2.1      | Frequencies and summary statistics . . . . .                                                  | 10        |
| 2.2      | Log transformation of income and spending . . . . .                                           | 11        |
| 2.3      | Correlations between personality variables and spending . . . . .                             | 12        |
| <b>3</b> | <b>Published Results</b>                                                                      | <b>14</b> |
| <b>4</b> | <b>Longitudinal Analyses</b>                                                                  | <b>17</b> |
| 4.1      | Plots . . . . .                                                                               | 17        |
| <b>5</b> | <b>Reviewed Results</b>                                                                       | <b>24</b> |
| <b>6</b> | <b>Pre-registered Analyses</b>                                                                | <b>26</b> |
| 6.1      | Question 1: Does personality predict the amount of spending during the holidays? . . . . .    | 26        |
| 6.2      | Question 2: Does personality predict changes in spending across the holiday season? . . . . . | 27        |
| <b>7</b> | <b>Exploratory analyses</b>                                                                   | <b>31</b> |
| 7.1      | Recalculated covariates . . . . .                                                             | 31        |
| 7.2      | Research Question 2 . . . . .                                                                 | 31        |
| 7.3      | Fractional binomial . . . . .                                                                 | 31        |
| <b>8</b> | <b>Session Information</b>                                                                    | <b>36</b> |

---

<sup>1</sup> Department of Medical Social Sciences, Northwestern University, Chicago, Illinois.

<sup>2</sup> University College London, London, UK

<sup>3</sup> Department of Psychology, Northwestern University, Evanston, Illinois.

# 1 Data Cleaning

This section documents the methods used to clean and transform data prior to data-analysis.

First we load the data, which is stored in a .csv file. The object `data.path` stores the location of the data file on the machine.

```
holiday <- read.csv(paste0(data.path, "May 2017 to June 2016 - subsample.csv"),
  stringsAsFactors = FALSE)
```

We remove duplicate rows.

```
holiday <- unique(holiday)
```

The variables used throughout the analyses are listed in Table 1.

| Variable                           | Description                                                                        |
|------------------------------------|------------------------------------------------------------------------------------|
| <code>userreference</code>         | Unique person ID number                                                            |
| <code>transactiondate</code>       | Date of transaction (originally a string, transformed to a date)                   |
| <code>creditdebit</code>           | Whether transaction is credits or debits the account, character class              |
| <code>userprecedencetagname</code> | How the user tagged the transaction. Categories provided                           |
| <code>amount</code>                | The total amount of money (in British pounds) in the transaction                   |
| <code>salaryrange</code>           | self-reported income, factor class variable                                        |
| <code>derivedgender</code>         | estimated gender                                                                   |
| <code>big5.e</code>                | Extraversion item: "I see myself as someone who is outgoing, sociable."            |
| <code>big5.e.r</code>              | Extraversion item: "I see myself as someone who is reserved."                      |
| <code>big5.a</code>                | Agreeableness item: "I see myself as someone who is generally trusting."           |
| <code>big5.a.r</code>              | Agreeableness item: "I see myself as someone who tends to find fault with others." |
| <code>big5.c</code>                | Conscientiousness item: "I see myself as someone who does a thorough job."         |
| <code>big5.c.r</code>              | Conscientiousness item: "I see myself as someone who tends to be lazy."            |
| <code>big5.n</code>                | Neuroticism item: "I see myself as someone who gets nervous easily."               |
| <code>big5.n.r</code>              | Neuroticism item: "I see myself as someone who is relaxed, handles stress well."   |
| <code>big5.o</code>                | Openness item: "I see myself as someone who has an active imagination"             |
| <code>big5.o.r</code>              | Openness item: "I see myself as someone who has few artistic interests."           |
| <code>yearofbirth</code>           | Year the participant was born.                                                     |

Table 1: Variables used in analyses

Transaction date is stored as a character variable. We make transaction date variable class `Date`.

```
head(holiday$transactiondate)

## [1] "2017-05-12" "2017-05-04" "2017-05-24" "2017-05-24" "2017-05-27"
## [6] "2017-04-28"

holiday$transactiondate <- as.Date(holiday$transactiondate)
```

Some participants provided data for longer than one year. We choose to remove these transactions. We acknowledge that this limits power; however, given the changing nature of the economy, we feel this is more defensible than attempting to aggregate spending patterns across different years. We ultimately remove  $1.41171 \times 10^5$  transactions, which accounts for 5 % of the data.

```
length(which(holiday$transactiondate <= "2016-05-30"))

## [1] 141171

length(which(holiday$transactiondate <= "2016-05-30"))/nrow(holiday)

## [1] 0.05418219

holiday <- holiday %>% filter(transactiondate > "2016-05-30")
```

We remove “debit” categories that are actually credit card payments (i.e., already spent).

```
holiday <- subset(holiday, !(creditdebit == "Debit" &
  userprecedencetagname %in% c("Credit card payment",
    "Credit card repayment",
    "Store card repayment")))
```

We remove non-income credit categories.

```
holiday <- subset(holiday, creditdebit == "Debit" |
  (creditdebit == "Credit" &
    userprecedencetagname %in% c("Salary (main)",
      "Family benefits",
      "Interest income",
      "Rental income (whole property)",
      "Miscellaneous income - other",
      "Salary (secondary)",
      "Other benefits",
      "Gambling account",
      "Work pension",
      "State pension",
      "Gift",
      "Winnings",
      "Mortgage release",
      "Job seekers benefits",
      "Rental income (room)",
      "Employment - other",
      "Incapacity benefits",
      "Sale - other",
      "Dividend",
      "Investment - other",
      "Tax rebate",
      "Property - other",
      "Child support",
      "Bonus",
      "Investment income - other",
      "Pension - other",
      "Bursary",
      "Other account",
      "Sharedealing account",
      "Inheritance",
      "Vehicle",
      "Bond income",
      "Overtime",
      "Divorce settlement")))
```

## 1.1 Transformations and indices

We calculate the total amount of credit and debit for each participant based on their transactions in each category. This measure of credit and debit (i.e., spending) is more objective than self-reported income and spending amounts, as it is based on real-world behavior. However, we also acknowledge that these data are noisy and may omit forms of spending or credit that are not linked to the app. We provide the correlations between self-report income and the estimated values for reference.

```
holiday = holiday %>%
  group_by(userreference, creditdebit) %>%
  summarize(amount = sum(amount, na.rm=T)) %>%
  ungroup() %>%
  spread(key = "creditdebit", value = "amount") %>%
  rename(yearly_spending = Debit,
    yearly_income = Credit) %>%
  dplyr::select(userreference, yearly_spending, yearly_income) %>%
  full_join(holiday)

## Joining, by = "userreference"
```

*Note: After running analyses, it became clear that participants provided data across different spans of time. That is some participants provided data across a year, some provided data across less than a year and*

some provided data across more than a year. Consequently, we calculate adjusted credit and spending amounts by calculating the average daily credit and debit, only from days outside the holiday season, and multiplying by 61 (the number of days in November and December) to estimate bi-monthly credit and spending.

```
holiday <- holiday %>%
  group_by(userreference, creditdebit, transactiondate) %>%
  filter(transactiondate < "2016-11-01") %>%
  summarize(amount = sum(amount, na.rm=T)) %>%
  ungroup() %>%
  spread(key = "creditdebit", value = "amount") %>%
  group_by(userreference) %>%
  summarize(n = n(),
            total_credit = sum(Credit, na.rm=T),
            total_spend = sum(Debit, na.rm=T),
            daily_credit = total_credit/n,
            daily_spend = total_spend/n,
            est_bi_credit = daily_credit*61,
            est_bi_spend = daily_spend*61) %>%
  merge(holiday)
```

Now that we have estimates of bi-monthly credit (i.e., income), we filter out individual credit transactions.

```
holiday <- subset(holiday, creditdebit == "Debit")
```

We create a numeric version of the self-reported income variable. We do so by first assigning each response the value that is in the middle of the range they specified. We then specify the class of variable as numeric, to allow for correlations.

```
holiday$income <- dplyr::recode(holiday$salaryrange,
                              `< 10K` = "5",
                              `10K to 20K` = "15",
                              `20K to 30K` = "25",
                              `30K to 40K` = "35",
                              `40K to 50K` = "45",
                              `50K to 60K` = "55",
                              `60K to 70K` = "65",
                              `70K to 80K` = "75",
                              `> 80K` = "85",
                              .missing="missing")
holiday$income <- as.numeric(holiday$income)
```

This variable correlates 0.06 with the estimated bi-monthly income variable.

```
cor.test(holiday$income, holiday$est_bi_credit)

##
## Pearson's product-moment correlation
##
## data: holiday$income and holiday$est_bi_credit
## t = 75.516, df = 1815700, p-value < 2.2e-16
## alternative hypothesis: true correlation is not equal to 0
## 95 percent confidence interval:
##  0.05450385 0.05740381
## sample estimates:
##      cor
## 0.05595395
```

We create a binary gender variable, male, in which 1 indicates whether the participant was identified as male, and 0 if the participant was identified as female or not identified.

```
holiday$male <- ifelse(holiday$derivedgender == "M", 1, 0)
```

## 1.2 Calculate personality scores

### 1.2.1 Average scores

We originally calculated personality scores by reverse scoring the negatively keyed variables (indicated by “\_r”) and averaging responses.

```
personality.keys = list(
  extra = c("big5_e", "-big5_e_r"),
  agree = c("big5_a", "-big5_a_r"),
  con = c("big5_c", "-big5_c_r"),
  neur = c("big5_n", "-big5_n_r"),
  open = c("big5_o", "-big5_o_r"))
personality.keys <- make.keys(holiday[,grepl("big5", names(holiday))], personality.keys)
score.personality <- scoreItems(keys = personality.keys,
                                items = holiday[,grepl("big5", names(holiday))])

score.personality

## Call: scoreItems(keys = personality.keys, items = holiday[, grepl("big5",
##   names(holiday))])
##
## (Unstandardized) Alpha:
##      extra agree  con neur open
## alpha  0.75  0.28  0.57  0.64  0.32
##
## Standard errors of unstandardized Alpha:
##      extra agree  con neur open
## ASE   0.001 0.0013 0.0012 0.0011 0.0013
##
## Average item correlation:
##      extra agree con neur open
## average.r  0.6  0.16  0.4  0.47  0.19
##
## Median item correlation:
## extra agree  con neur open
## 0.60  0.17  0.41  0.48  0.20
##
## Guttman 6* reliability:
##      extra agree  con neur open
## Lambda.6  0.64  0.24  0.45  0.55  0.26
##
## Signal/Noise based upon av.r :
##      extra agree con neur open
## Signal/Noise  2.9  0.39  1.4  1.8  0.48
##
## Scale intercorrelations corrected for attenuation
## raw correlations below the diagonal, alpha on the diagonal
## corrected correlations above the diagonal:
##      extra agree  con neur open
## extra  0.747  0.13  0.069 -0.119  0.66
## agree  0.061  0.28  0.332 -0.384  0.47
## con    0.045  0.13  0.575 -0.473  0.13
## neur  -0.083 -0.16 -0.287  0.643 -0.13
## open   0.323  0.14  0.054 -0.058  0.32
##
## In order to see the item by scale loadings and frequency counts of the data
## print with the short option = FALSE

holiday <- cbind(holiday, score.personality$scores)
```

We standardize these personality variables.

```
holiday_p = holiday %>%
  group_by(userreference) %>%
  filter(row_number() == 1) %>%
  dplyr::select(userreference, extra, agree, con, neur, open)

holiday_p$z_extra = as.numeric(scale(holiday_p$extra))
holiday_p$z_agree = as.numeric(scale(holiday_p$agree))
holiday_p$z_con   = as.numeric(scale(holiday_p$con))
holiday_p$z_neur  = as.numeric(scale(holiday_p$neur))
holiday_p$z_open  = as.numeric(scale(holiday_p$open))
```

```
holiday = holiday %>%
  full_join(holiday_p)
```

## 1.2.2 Latent scores

Based on feedback during the review process, we also calculate latent personality traits scores. These were used in the results presented in the manuscript. However, we use this supplementary file to document all analyses performed, and so models with the average scores (instead of latent scores) are presented later in this document.

To estimate latent factor scores, we construct a single model in which each latent trait is indicated by two items. Latent variables are allowed to correlate. The model resulted in some negative variances; when this happened, we set those residual variances to 0.

```
#reverse score personality variables
holiday[,rownames(personality.keys)] = reverse.code(keys = rowSums(personality.keys),
                                                    items = holiday[,rownames(personality.keys)])

#select one observation for each person
holiday_p = holiday %>%
  group_by(userreference) %>%
  filter(row_number() == 1)
```

```
latent.p = '
latent.e =~ big5_e + big5_e_r

latent.a =~ big5_a + big5_a_r

latent.c =~ big5_c + big5_c_r

latent.n =~ big5_n + big5_n_r

latent.o =~ big5_o + big5_o_r

big5_a ~~ 0*big5_a
big5_n_r ~~ 0*big5_n_r
'
```

```
cfa.p = cfa(model = latent.p, data = holiday_p, REML=TRUE, missing = "pairwise")
summary(cfa.p, fit.measures = T)
```

```
## lavaan (0.5-23.1097) converged normally after 80 iterations
##
##                               Used      Total
## Number of observations          1981      2168
##
## Estimator                       ML
## Minimum Function Test Statistic  473.041
## Degrees of freedom               27
## P-value (Chi-square)             0.000
##
## Model test baseline model:
##
## Minimum Function Test Statistic  3095.371
## Degrees of freedom               45
## P-value                          0.000
##
## User model versus baseline model:
##
## Comparative Fit Index (CFI)      0.854
## Tucker-Lewis Index (TLI)        0.756
##
## Loglikelihood and Information Criteria:
##
## Loglikelihood user model (H0)     -33487.122
## Loglikelihood unrestricted model (H1) -33250.602
##
## Number of free parameters         28
## Akaike (AIC)                      67030.244
## Bayesian (BIC)                    67186.802
## Sample-size adjusted Bayesian (BIC) 67097.845
```

```

##
## Root Mean Square Error of Approximation:
##
## RMSEA                                0.091
## 90 Percent Confidence Interval        0.084 0.099
## P-value RMSEA <= 0.05                0.000
##
## Standardized Root Mean Square Residual:
##
## SRMR                                0.060
##
## Parameter Estimates:
##
## Information                            Expected
## Standard Errors                       Standard
##
## Latent Variables:
##      Estimate Std.Err z-value P(>|z|)
## latent.e =~
##   big5_e      1.000
##   big5_e_r    0.637  0.048 13.169  0.000
## latent.a =~
##   big5_a      1.000
##   big5_a_r    0.258  0.029  8.886  0.000
## latent.c =~
##   big5_c      1.000
##   big5_c_r    0.571  0.066  8.591  0.000
## latent.n =~
##   big5_n      1.000
##   big5_n_r    1.741  0.071 24.629  0.000
## latent.o =~
##   big5_o      1.000
##   big5_o_r    0.708  0.087  8.097  0.000
##
## Covariances:
##      Estimate Std.Err z-value P(>|z|)
## latent.e ~~
##   latent.a    0.415  0.043  9.716  0.000
##   latent.c    0.129  0.044  2.968  0.003
##   latent.n   -0.038  0.027 -1.417  0.156
##   latent.o    0.551  0.038 14.480  0.000
## latent.a ~~
##   latent.c    0.128  0.034  3.727  0.000
##   latent.n   -0.085  0.021 -3.987  0.000
##   latent.o    0.250  0.028  8.880  0.000
## latent.c ~~
##   latent.n   -0.343  0.027 -12.666  0.000
##   latent.o    0.128  0.029  4.477  0.000
## latent.n ~~
##   latent.o   -0.054  0.018 -3.075  0.002
##
## Variances:
##      Estimate Std.Err z-value P(>|z|)
## .big5_a      0.000
## .big5_n_r    0.000
## .big5_e      0.034  0.162  0.211  0.833
## .big5_e_r    1.652  0.084 19.615  0.000
## .big5_a_r    2.444  0.078 31.472  0.000
## .big5_c      0.297  0.142  2.084  0.037
## .big5_c_r    1.746  0.072 24.168  0.000
## .big5_n      1.939  0.062 31.472  0.000
## .big5_o      0.679  0.060 11.373  0.000
## .big5_o_r    1.948  0.068 28.689  0.000
## latent.e     2.321  0.179 12.990  0.000
## latent.a     1.460  0.046 31.472  0.000
## latent.c     1.306  0.151  8.670  0.000
## latent.n     0.594  0.052 11.468  0.000
## latent.o     0.424  0.062  6.826  0.000
##
## estimate latent variable scores for each person
latent.scores = as.data.frame(predict(cfa.p))
latent.scores$userreference = holiday_p$userreference
holiday = latent.scores %>%
  full_join(holiday)

```

The correlations between the average personality scores and latent variable scores are presented in Table

|          | extra | agree | con   | neur  | open  | latent.e | latent.a | latent.c | latent.n | latent.o |
|----------|-------|-------|-------|-------|-------|----------|----------|----------|----------|----------|
| extra    | 1.00  | 0.06  | 0.05  | -0.08 | 0.32  | 0.89     | 0.16     | 0.04     | 0.04     | 0.65     |
| agree    | 0.06  | 1.00  | 0.13  | -0.16 | 0.14  | 0.10     | 0.69     | 0.14     | -0.19    | 0.26     |
| con      | 0.05  | 0.13  | 1.00  | -0.29 | 0.05  | 0.03     | 0.08     | 0.86     | -0.33    | 0.16     |
| neur     | -0.08 | -0.16 | -0.29 | 1.00  | -0.06 | -0.08    | -0.02    | -0.36    | 0.83     | -0.16    |
| open     | 0.32  | 0.14  | 0.05  | -0.06 | 1.00  | 0.34     | 0.21     | 0.06     | 0.00     | 0.77     |
| latent.e | 0.89  | 0.10  | 0.03  | -0.08 | 0.34  | 1.00     | 0.22     | 0.07     | -0.01    | 0.73     |
| latent.a | 0.16  | 0.69  | 0.08  | -0.02 | 0.21  | 0.22     | 1.00     | 0.14     | -0.11    | 0.44     |
| latent.c | 0.04  | 0.14  | 0.86  | -0.36 | 0.06  | 0.07     | 0.14     | 1.00     | -0.44    | 0.24     |
| latent.n | 0.04  | -0.19 | -0.33 | 0.83  | 0.00  | -0.01    | -0.11    | -0.44    | 1.00     | -0.13    |
| latent.o | 0.65  | 0.26  | 0.16  | -0.16 | 0.77  | 0.73     | 0.44     | 0.24     | -0.13    | 1.00     |

Table 2: Correlations between scale scores and latent personality variables

2.

```
kable(cor(holiday[,c("extra", "agree", "con", "neur", "open",
                    "latent.e", "latent.a", "latent.c",
                    "latent.n", "latent.o")], use = "pairwise"),
      digits = 2, booktabs = TRUE, escape = FALSE,
      caption = "Correlations between scale scores and latent personality variables \\label{tab:pers}")
kable_styling()
```

### 1.3 Wide-form data set

This data summarizes information for each participant, e.g., holiday spending, total spending, etc., so that each participant has one exactly row.

First we calculate each person's total spending the holiday season.

```
holiday_wide <- holiday %>%
  group_by(userreference) %>%
  filter(transactiondate >= "2016-11-01" & transactiondate <= "2016-12-31") %>%
  summarize(NovDec_spending = sum(amount, na.rm=T))
```

Next, we merge this with the first row of data for each person and the holiday\_calc data, which contains calculated yearly income and yearly spending.

```
holiday_wide <- holiday %>%
  group_by(userreference) %>%
  filter(row_number() == 1) %>%
  merge(holiday_wide)
```

In this data set, we standardized yearly spending, estimate age in 1960, and calculate the ratio of holiday spending to total spending. We also calculate the ratio of yearly spending to yearly income (Credit), in the event of multicollinearity issues.

```
holiday_wide = holiday_wide %>%
  mutate(
    # standardized yearly spending
    z_yearlyspending = as.numeric(scale(yearly_spending)),
    # calculate age from year of birth and 2016, then standardize
    age = 2016-yearofbirth,
    z_age = as.numeric(scale(age)),
    # standardize estimated bi-monthly income and spending
    z_est_bi_credit = as.numeric(scale(est_bi_credit)),
    z_est_bi_spend = as.numeric(scale(est_bi_spend)))
```



We also log-transform spending and income variables.

```
holiday_wide = holiday_wide %>%  
  mutate(log_NovDec = log(NovDec_spending),  
         log_credit = log(est_bi_credit + 1),  
         log_spend = log(est_bi_spend + 1))
```

## 1.4 Holiday season data set

This data set contains daily spending amounts for each person and allows us to track trajectories of spending. To create this, we sum spending each day for each person and merge this with the person-level predictors. We also create two new variables: the number of days since November 1 and the ratio of spending in that day to the total amount spent during the holiday season.

```
holiday_novdec <- holiday %>%  
  filter(transactiondate >= "2016-11-01" & transactiondate <= "2016-12-31") %>%  
  group_by(userreference, transactiondate) %>%  
  summarize(amount = sum(amount, na.rm=T)) %>%  
  merge(subset(holiday_wide, select=c(userreference, age, z_age, male,  
                                     est_bi_credit, est_bi_spend,  
                                     z_est_bi_credit, z_est_bi_spend,  
                                     NovDec_spending, z_yearlyspending,  
                                     extra, agree, con, neur, open,  
                                     z_extra, z_agree, z_con, z_neur, z_open,  
                                     latent.e, latent.a, latent.c, latent.n, latent.o))) %>%  
  mutate(days = as.numeric(transactiondate - as.Date("2016-11-01")),  
         daily_ratio = amount/NovDec_spending)
```

Again, we calculate the log-transformed spending and income variables.

```
holiday_novdec = holiday_novdec %>%  
  mutate(log_amount = log(amount + 1),  
         log_credit = log(est_bi_credit + 1),  
         log_spend = log(est_bi_spend + 1))
```

We save our two data sets.

```
save(holiday_wide, holiday_novdec, file = "cleaned_holiday.Rdata")
```

| Category | Number | Percent |
|----------|--------|---------|
| F        | 257    | 0.12    |
| M        | 946    | 0.45    |
| U        | 915    | 0.43    |

Table 3: Gender breakdown in sample

## 2 Descriptive statistics

### 2.1 Frequencies and summary statistics

This section describes the cleaned data set. Table 3 displays the frequency and percentage of each gender category (F - female, M - male, U - unknown). As a reminder, these genders are not self-reported, but are derived from the data by the company who created the money management app.

```
gender.tab = data.frame(N = table(holiday_wide$derivedgender),
                        percent = table(holiday_wide$derivedgender)/nrow(holiday_wide))
kable(gender.tab[, -3], booktabs = TRUE, escape = FALSE, digits = 2,
      col.names = c("Category", "Number", "Percent"),
      caption = "Gender breakdown in sample \\label{tab:gender}") %>%
kable_styling()
```

Table 4 displays the descriptive statistics for the variables used in the published analyses.

```
holiday_wide %>%
  select(age, male, n,
         est_bi_credit, est_bi_spend,
         NovDec_spending,
         latent.e, latent.a, latent.c, latent.n, latent.o) %>%
  rename(Age = age,
         Male = male,
         `Number of transactions` = n,
         `Estimated Bimonthly Income` = est_bi_credit,
         `Estimated Bimonthly Spending` = est_bi_spend,
         `Holiday Spending` = NovDec_spending,
         `Extraversion (latent score)` = latent.e,
         `Agreeableness (latent score)` = latent.a,
         `Conscientiousness (latent score)` = latent.c,
         `Neuroticism (latent score)` = latent.n,
         `Openness (latent score)` = latent.o) %>%

  describe() %>%
  dplyr::select(-vars, -trimmed, -mad, -range) %>%
  kable(., booktabs = TRUE, escape = FALSE, digits = 2,
        caption = "Descriptive statistics \\label{tab:describe}") %>%
  kable_styling(font_size = 10)
```

We also print the interquartile range of the spending and credit variables.

```
IQR(holiday_wide$NovDec_spending)
```

```
## [1] 12158.54
```

|                                  | n    | mean     | sd       | median   | min   | max        | skew  | kurtosis | se      |
|----------------------------------|------|----------|----------|----------|-------|------------|-------|----------|---------|
| Age                              | 2118 | 37.45    | 11.87    | 35.00    | 14.00 | 86.00      | 1.02  | 0.82     | 0.26    |
| Male                             | 2118 | 0.45     | 0.50     | 0.00     | 0.00  | 1.00       | 0.21  | -1.95    | 0.01    |
| Number of transactions           | 2118 | 95.65    | 37.84    | 103.00   | 1.00  | 154.00     | -0.81 | -0.05    | 0.82    |
| Estimated Bimonthly Income       | 2118 | 1751.18  | 5735.49  | 156.85   | 0.00  | 116931.46  | 11.03 | 173.34   | 124.63  |
| Estimated Bimonthly Spending     | 2118 | 23028.46 | 36824.73 | 13727.48 | 0.00  | 873559.07  | 9.17  | 154.58   | 800.16  |
| Holiday Spending                 | 2118 | 17527.43 | 69388.78 | 8758.45  | 1.82  | 2827642.79 | 32.72 | 1280.74  | 1507.74 |
| Extraversion (latent score)      | 1935 | 0.00     | 1.52     | -0.15    | -3.16 | 2.82       | -0.20 | -0.81    | 0.03    |
| Agreeableness (latent score)     | 1935 | 0.00     | 1.21     | -0.27    | -4.27 | 1.73       | -0.78 | 0.54     | 0.03    |
| Conscientiousness (latent score) | 1935 | 0.01     | 1.04     | 0.04     | -3.65 | 1.60       | -0.86 | 0.61     | 0.02    |
| Neuroticism (latent score)       | 1935 | 0.00     | 0.77     | 0.08     | -1.06 | 2.38       | 0.72  | 0.02     | 0.02    |
| Openness (latent score)          | 1935 | 0.00     | 0.49     | 0.02     | -2.01 | 1.18       | -0.41 | 0.36     | 0.01    |

Table 4: Descriptive statistics

```
IQR(holiday_wide$est_bi_credit)
## [1] 1357.639

IQR(holiday_wide$est_bi_spend)
## [1] 15614.29
```

## 2.2 Log transformation of income and spending

Recall that spending and income variables were log-transformed. Here we plot the raw and transformed values, to demonstrate the need for transformation.

```
#pdf("figure_density.pdf", height = 4.27, width = 6.26)
p1 <- ggplot(subset(holiday_wide, NovDec_spending < 1000000), aes(x = NovDec_spending)) +
  geom_density(fill = "grey") +
  scale_x_continuous("Total Holiday Spending") +
  ggtitle("Untransformed Spending", ) +
  theme_bw()
p2 <- ggplot(holiday_wide, aes(x = log_NovDec)) +
  geom_density(fill = "grey") +
  scale_x_continuous("Total Holiday Spending (log transformed)") +
  ggtitle("Transformed Spending") +
  theme_bw()
p3 <- ggplot(subset(holiday_novdec, amount < 20000), aes(x = amount)) +
  geom_density(fill = "grey") +
  scale_x_continuous("Daily Holiday Spending") +
  ggtitle("Untransformed Spending") +
  theme_bw()
p4 <- ggplot(holiday_novdec, aes(x = log_amount)) +
  geom_density(fill = "grey") +
  scale_x_continuous("Daily Holiday Spending (log transformed)") +
  ggtitle("Transformed Spending") +
  theme_bw()

grid.arrange(p1, p2, p3, p4, ncol = 2)
```

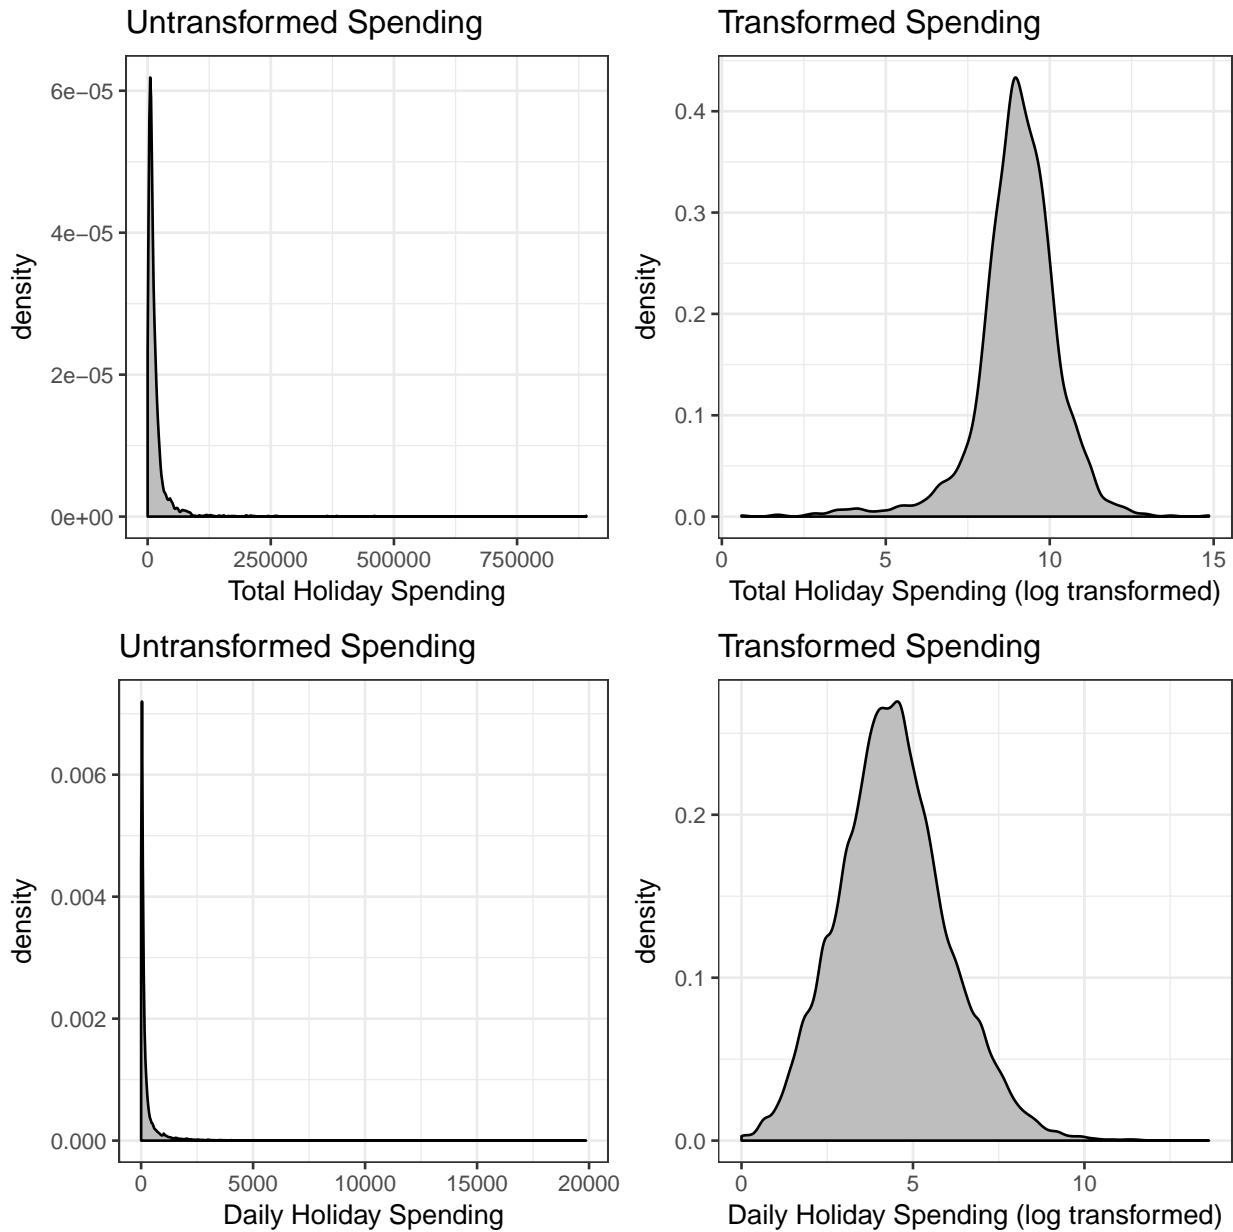

```
#dev.off()
```

### 2.3 Correlations between personality variables and spending

We examine the correlations between the latent personality trait scores and transformed holiday spending. These raw associations were reported in the manuscript. To do so, we run a correlation test and save the result to an object. These results are formatted and printed in the paragraph below. We also create a correlation table, which is saved to a word document. This is copied into the manuscript.

```
cor.e <- cor.test(holiday_wide$log_NovDec, holiday_wide$latent.e, use="pairwise")
cor.a <- cor.test(holiday_wide$log_NovDec, holiday_wide$latent.a, use="pairwise")
cor.c <- cor.test(holiday_wide$log_NovDec, holiday_wide$latent.c, use="pairwise")
```

```

cor.n <- cor.test(holiday_wide$log_NovDec, holiday_wide$latent.n, use="pairwise")
cor.o <- cor.test(holiday_wide$log_NovDec, holiday_wide$latent.o, use="pairwise")

cor.table <- holiday_wide %>%
  select(age, male, log_credit, log_spend, log_NovDec,
         latent.e, latent.a, latent.c, latent.n, latent.o) %>%
  rename(income = log_credit,
         spending = log_spend,
         holiday = log_NovDec,
         extra = latent.e,
         agree = latent.a,
         neur = latent.c,
         con = latent.n,
         open = latent.o) %>%
  apa.cor.table(filename = "cortable.doc")

```

Total holiday spending (log-transformed) was positively associated with extraversion ( $r = .03$ , 95% CI  $[-.02, .07]$ ,  $t(1,933) = 1.12$ ,  $p = .262$ ), conscientiousness ( $r = .10$ , 95% CI  $[.06, .15]$ ,  $t(1,933) = 4.48$ ,  $p < .001$ ) and negatively associated with neuroticism ( $r = -.10$ , 95% CI  $[-.14, -.05]$ ,  $t(1,933) = -4.20$ ,  $p < .001$ ). Holiday spending was not found to be associated with agreeableness ( $r = -.06$ , 95% CI  $[-.10, -.01]$ ,  $t(1,933) = -2.58$ ,  $p = .010$ ) or openness ( $r = .00$ , 95% CI  $[-.04, .05]$ ,  $t(1,933) = 0.03$ ,  $p = .977$ ).

We standardize the latent variable scores for easier interpretation of results.

```

holiday_wide = holiday_wide %>%
  mutate(z.latent.e = as.numeric(scale(latent.e)),
         z.latent.a = as.numeric(scale(latent.a)),
         z.latent.c = as.numeric(scale(latent.c)),
         z.latent.n = as.numeric(scale(latent.n)),
         z.latent.o = as.numeric(scale(latent.o)))

#add these scores to the long-form data set

holiday_novdec = holiday_wide %>%
  dplyr::select(userreference, z.latent.e, z.latent.a, z.latent.c, z.latent.n, z.latent.o) %>%
  full_join(holiday_novdec)

```

### 3 Published Results

The results of these analyses were published in the manuscript.

For these analyses, we log-transformed spending and income. We also used estimates of credit and spending covariates based on days outside the holiday season. Latent personality trait scores were estimated from a CFA model. The results of this model are displayed in Table 5.

```
pr.lm <- lm(log(NovDec_spending) ~ z_age + male +
           log_credit + log_spend +
           z.latent.e + z.latent.a + z.latent.c + z.latent.n + z.latent.o,
           data = holiday_wide)
```

```
stargazer(pr.lm,
          title = "Do personality traits predict holiday spending? (published results)",
          intercept.bottom = F, intercept.top=T,
          ci = TRUE, digits=2, header = FALSE, label = "pr.tab",
          star.cutoffs = c(.05, .01, .001))
```

We create the plot for neuroticism and openness here.

```
n.est = plot_model(pr.lm, type = "pred", terms = "z.latent.n")
o.est = plot_model(pr.lm, type = "pred", terms = "z.latent.o")

n.est = n.est$data
n.est$trait = "Neuroticism"
o.est = o.est$data
o.est$trait = "Openness"

n.est %>%
  full_join(o.est) %>%
  ggplot(aes(x, exp(predicted))) +
  geom_ribbon(aes(ymin=exp(conf.low), ymax=exp(conf.high),
                fill = trait),
            alpha = .3) +
  geom_line(aes(color = trait)) +
  scale_x_continuous("Estimated trait score") +
  scale_y_continuous("Holiday spending in British pounds") +
  guides(fill = FALSE, color = FALSE) +
  facet_wrap(~trait, scales = "free_x") +
  theme_bw()

## Joining, by = c("x", "predicted", "conf.low", "conf.high", "group", "trait")
```

| <i>Dependent variable:</i> |                               |
|----------------------------|-------------------------------|
| log(NovDec_spending)       |                               |
| Constant                   | 1.73***<br>(1.29, 2.17)       |
| z_age                      | 0.01<br>(-0.04, 0.05)         |
| male                       | 0.12**<br>(0.03, 0.21)        |
| log_credit                 | 0.05***<br>(0.04, 0.07)       |
| log_spend                  | 0.73***<br>(0.69, 0.78)       |
| z.latent.e                 | 0.04<br>(-0.02, 0.11)         |
| z.latent.a                 | -0.03<br>(-0.08, 0.02)        |
| z.latent.c                 | 0.05*<br>(0.004, 0.10)        |
| z.latent.n                 | -0.06*<br>(-0.11, -0.01)      |
| z.latent.o                 | -0.09*<br>(-0.16, -0.02)      |
| Observations               | 1,935                         |
| R <sup>2</sup>             | 0.43                          |
| Adjusted R <sup>2</sup>    | 0.43                          |
| Residual Std. Error        | 0.96 (df = 1925)              |
| F Statistic                | 162.45*** (df = 9; 1925)      |
| <i>Note:</i>               | *p<0.05; **p<0.01; ***p<0.001 |

Table 5: Do personality traits predict holiday spending? (published results)

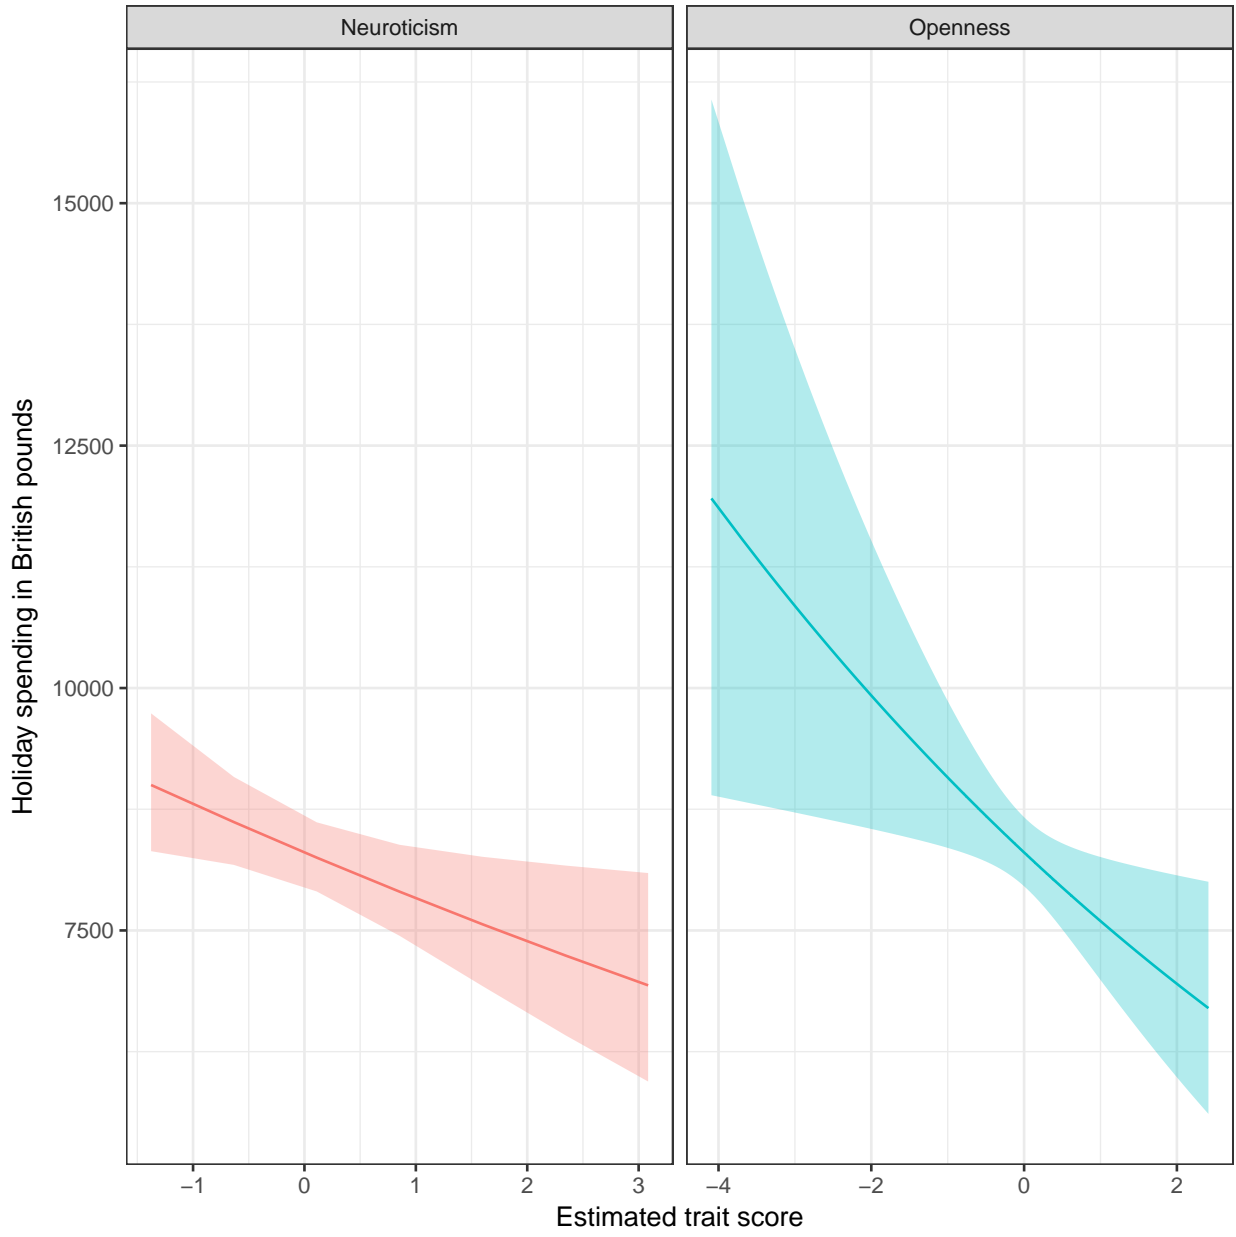

```
ggsave("estimatedspending.pdf", height = 4, width = 7)
```



## 4 Longitudinal Analyses

These analyses were briefly discussed in the published manuscript. Here, we provide greater detail and additional plots for interpretation. Results of the longitudinal model are displayed in Table 6.

```
# estimation parameters
nlopt <- function(par, fn, lower, upper, control) {
  .nloptr <-< res <- nloptr(par, fn, lb = lower, ub = upper,
    opts = list
      (algorithm = "NLOPT_LN_BOBYQA",
        print_level = 1,
        maxeval = 1000, xtol_abs = 1e-6,
        ftol_abs = 1e-6))
  list(par = res$solution,
    fval = res$objective,
    conv = if (res$status > 0) 0 else res$status,
    message = res$message
  )}
}
```

```
pr.lmer <- lmer(log(amount + 1) ~ days + z_age + male + log_credit + log_spend +
  z.latent.e + z.latent.a + z.latent.c + z.latent.n + z.latent.o +
  days*z_age + days*male + days*log_credit + days*log_spend +
  days*z.latent.e + days*z.latent.a + days*z.latent.c +
  days*z.latent.n + days*z.latent.o +
  (1 + days |userreference),
  data = holiday_novdec,
  control=lmerControl(optimizer = "nloptwrap", calc.derivs = FALSE))
```

```
stargazer(pr.lmer,
  title = "Do personality traits predict holiday spending trajectories? (published results)",
  font.size = "footnotesize", single.row = TRUE, header = FALSE,
  label = "pr.long",
  intercept.bottom = F, intercept.top=T, ci = TRUE, digits=2, no.space = T,
  star.cutoffs = c(.05, .01, .001))
```

### 4.1 Plots

First we plot summaries of amount spent across the holiday season in Figure ??.

```
holiday_novdec %>%
  mutate(weekend = ifelse(grepl("^S", weekdays(transactiondate)), 1, 0)) %>%
  mutate(Christmas = ifelse(transactiondate == "2016-12-25", "Christmas", "")) %>%
  ggplot(aes(x = days, y = amount, color = as.factor(weekend), fill = Christmas)) +
  geom_boxplot(aes(group = cut_width(days, 1))) +
  geom_smooth(aes(x = days, y = amount), inherit.aes = F) +
  scale_y_log10("Amount spent (log transformed)") +
  scale_x_continuous("Day of holiday season") +
  scale_color_manual("", labels = c("Weekday", "Weekend"), values = c("black", "#00BFC4")) +
  scale_fill_manual("", labels = c("", "Christmas"), values = c("white", "#F8766D")) +
  theme_bw()
```

|                     |  | <i>Dependent variable:</i>  |
|---------------------|--|-----------------------------|
|                     |  | log(amount + 1)             |
| Constant            |  | -0.10 (-0.44, 0.25)         |
| days                |  | 0.02*** (0.01, 0.03)        |
| z_age               |  | 0.12*** (0.08, 0.15)        |
| male                |  | 0.03 (-0.03, 0.09)          |
| log_credit          |  | 0.03*** (0.02, 0.04)        |
| log_spend           |  | 0.45*** (0.41, 0.49)        |
| z.latent.e          |  | 0.02 (-0.03, 0.06)          |
| z.latent.a          |  | -0.02 (-0.05, 0.02)         |
| z.latent.c          |  | 0.02 (-0.01, 0.05)          |
| z.latent.n          |  | -0.01 (-0.04, 0.02)         |
| z.latent.o          |  | -0.01 (-0.06, 0.04)         |
| days:z_age          |  | -0.0001 (-0.001, 0.001)     |
| days:male           |  | -0.0004 (-0.002, 0.001)     |
| days:log_credit     |  | -0.0004** (-0.001, -0.0001) |
| days:log_spend      |  | -0.001*** (-0.002, -0.001)  |
| days:z.latent.e     |  | 0.0004 (-0.001, 0.001)      |
| days:z.latent.a     |  | -0.0000 (-0.001, 0.001)     |
| days:z.latent.c     |  | 0.0000 (-0.001, 0.001)      |
| days:z.latent.n     |  | 0.0001 (-0.001, 0.001)      |
| days:z.latent.o     |  | 0.0001 (-0.001, 0.001)      |
| Observations        |  | 78,539                      |
| Log Likelihood      |  | -144,210.00                 |
| Akaike Inf. Crit.   |  | 288,467.90                  |
| Bayesian Inf. Crit. |  | 288,690.40                  |

Note: \*p<0.05; \*\*p<0.01; \*\*\*p<0.001

Table 6: Do personality traits predict holiday spending trajectories? (published results)

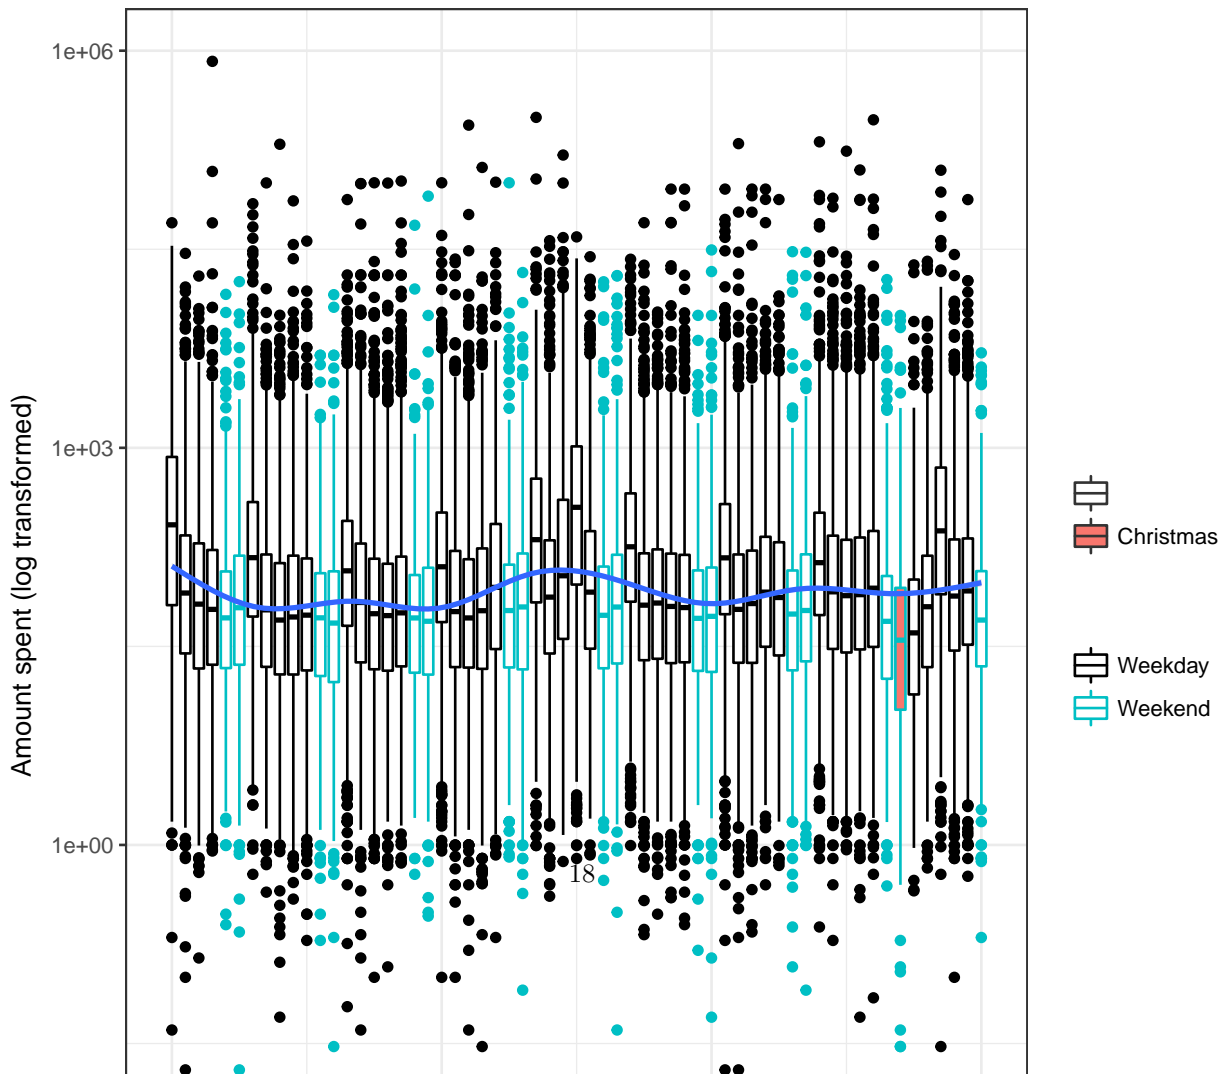

```
ggsave(filename = "spending_boxplots.pdf", width = 10, height = 7.5)
```

```
holiday_novdec %>%  
  filter(!is.na(z.latent.e)) %>%  
  mutate(extra.group = ifelse(z.latent.e > 0, "High Extraversion", "Low Extraversion")) %>%  
  mutate(Christmas = ifelse(transactiondate == "2016-12-25", "Christmas", "")) %>%  
  ggplot(aes(x = days, y = amount, fill = Christmas)) +  
  geom_boxplot(aes(group = cut_width(days, 1))) +  
  geom_smooth(se = F) +  
  scale_y_log10("Amount spent (log transformed)") +  
  scale_x_discrete("Day of holiday season") +  
  scale_fill_manual(values = c("white", "#F8766D")) +  
  theme_bw()+  
  theme(legend.position = "none")+  
  facet_grid(extra.group ~ .)
```

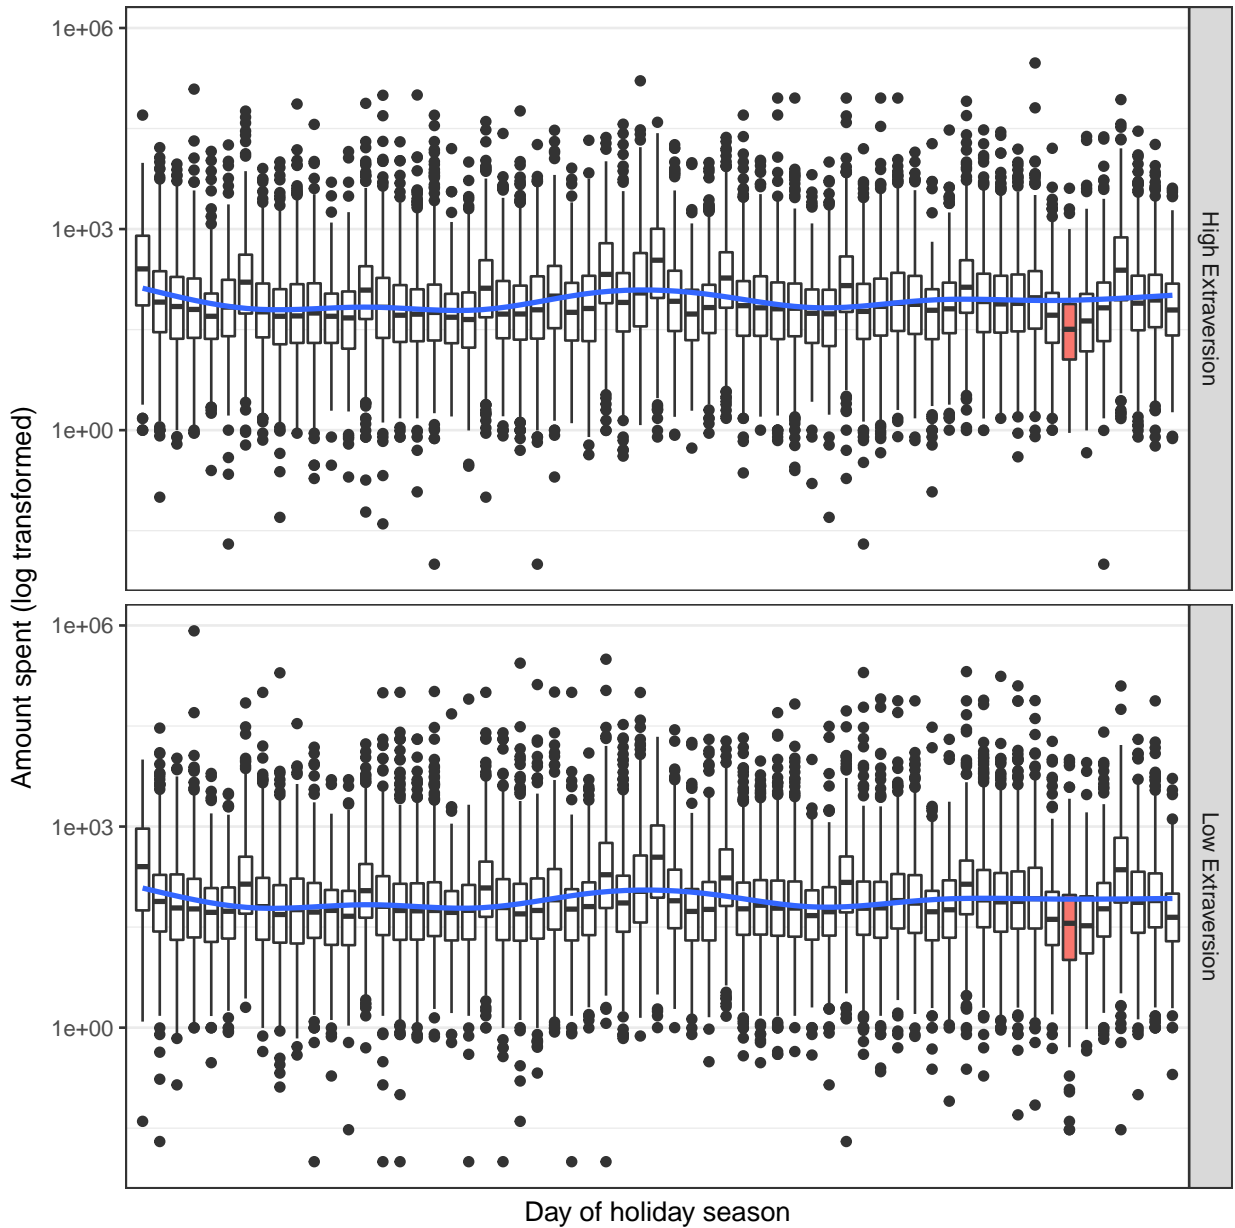

```

holiday_novdec %>%
  filter(!is.na(z.latent.a)) %>%
  mutate(agree.group = ifelse(z.latent.a > 0, "High Agreeableness", "Low Agreeableness")) %>%
  mutate(Christmas = ifelse(transactiondate == "2016-12-25", "Christmas", "")) %>%
  ggplot(aes(x = days, y = amount, fill = Christmas)) +
  geom_boxplot(aes(group = cut_width(days, 1))) +
  geom_smooth(se = F) +
  scale_y_log10("Amount spent (log transformed)") +
  scale_x_discrete("Day of holiday season") +
  scale_fill_manual(values = c("white", "#F8766D")) +
  theme_bw() +
  theme(legend.position = "none") +
  facet_grid(agree.group ~ .)

```

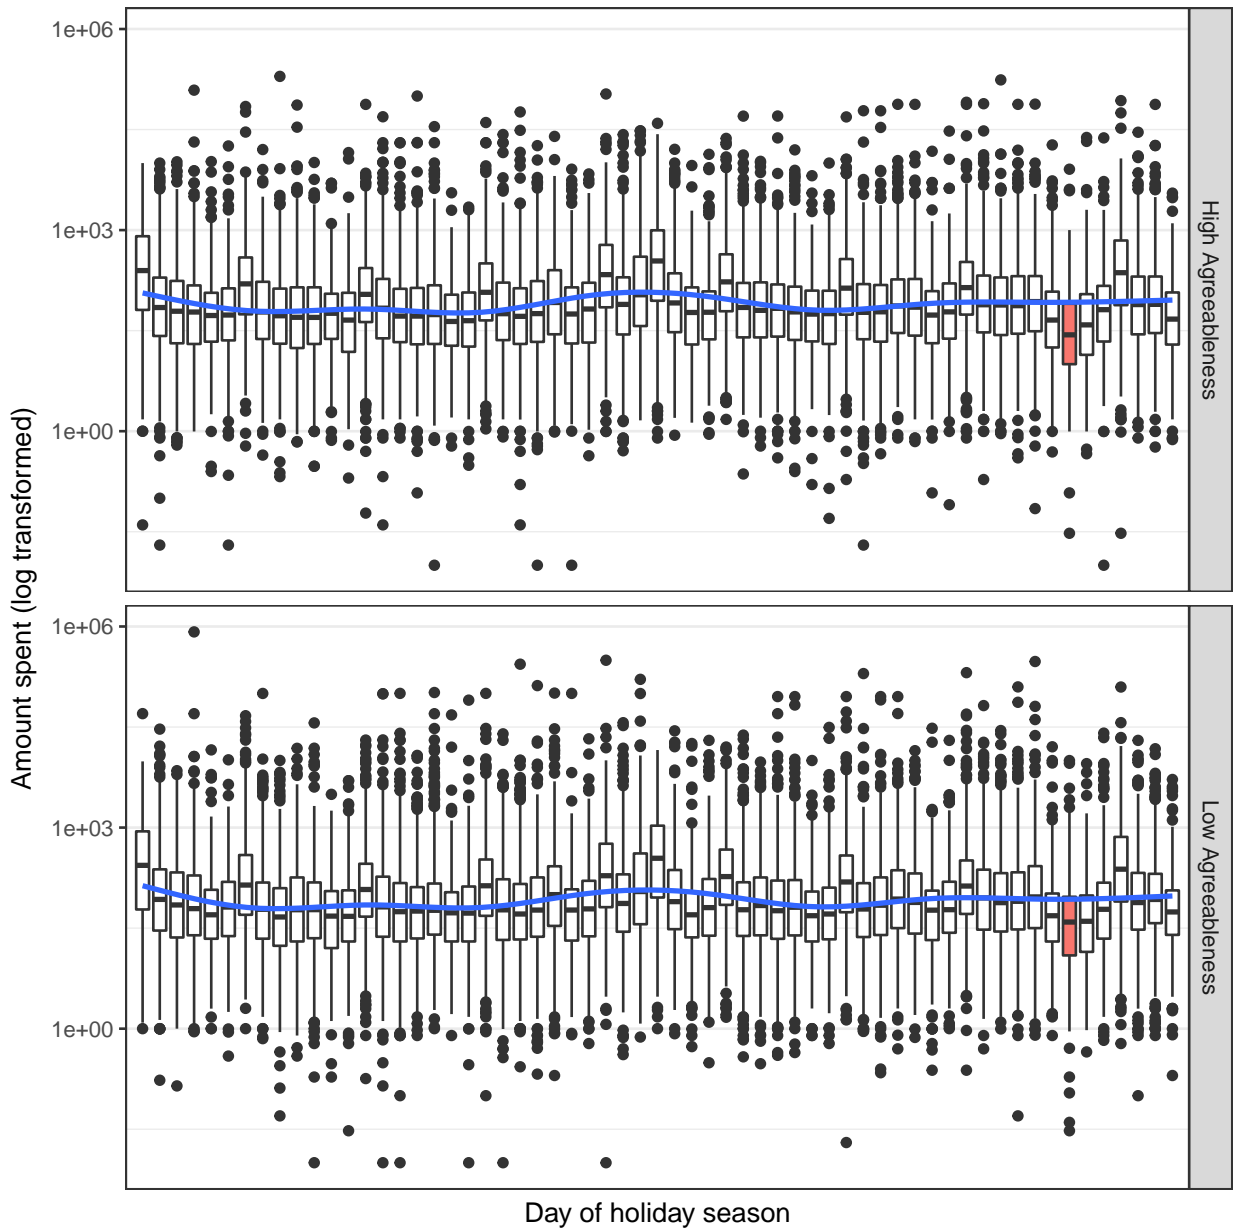

```

holiday_novdec %>%
  filter(!is.na(z.latent.c)) %>%

```

```

mutate(con.group = ifelse(z.latent.a >0, "High Conscientiousness", "Low Conscientiousness")) %>%
mutate(Christmas = ifelse(transactiondate == "2016-12-25", "Christmas", "")) %>%
ggplot(aes(x = days, y = amount, fill = Christmas)) +
geom_boxplot(aes(group = cut_width(days, 1))) +
geom_smooth(se = F) +
scale_y_log10("Amount spent (log transformed)") +
scale_x_discrete("Day of holiday season") +
scale_fill_manual(values = c("white", "#F8766D")) +
theme_bw()+
theme(legend.position = "none")+
facet_grid(con.group ~ .)

```

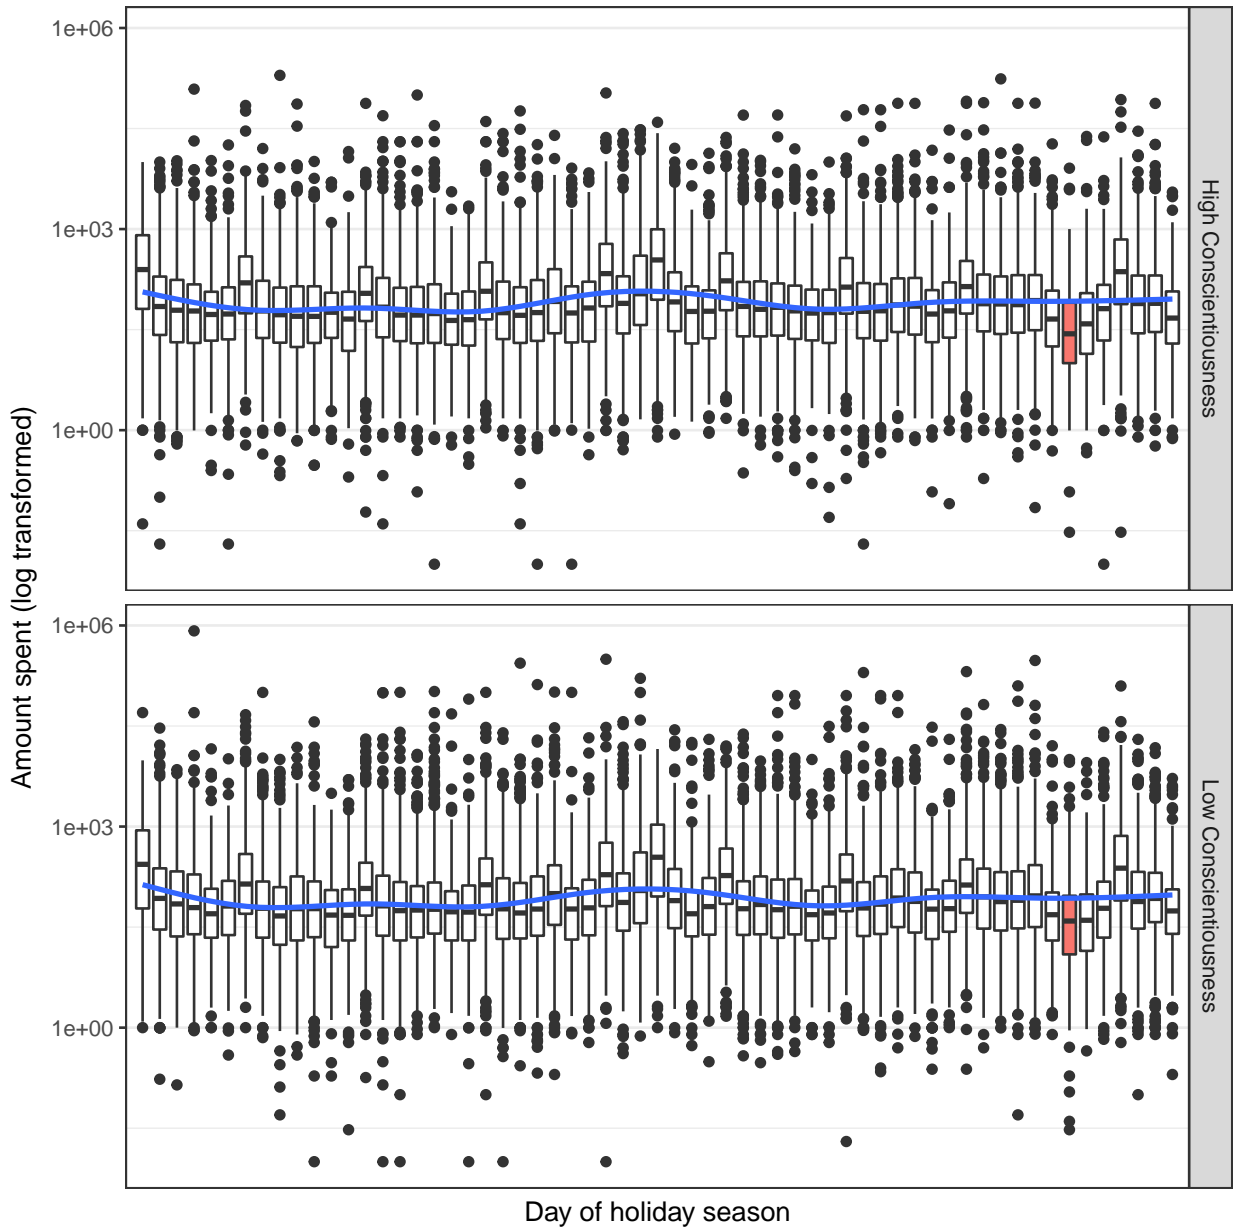

```

holiday_novdec %>%
filter(!is.na(z.latent.n)) %>%
mutate(neur.group = ifelse(z.latent.n >0, "High Neuroticism", "Low Neuroticism")) %>%
mutate(Christmas = ifelse(transactiondate == "2016-12-25", "Christmas", "")) %>%

```

```

ggplot(aes(x = days, y = amount, fill = Christmas)) +
  geom_boxplot(aes(group = cut_width(days, 1))) +
  geom_smooth(se = F) +
  scale_y_log10("Amount spent (log transformed)") +
  scale_x_discrete("Day of holiday season") +
  scale_fill_manual(values = c("white", "#F8766D")) +
  theme_bw()+
  theme(legend.position = "none")+
  facet_grid(neur.group ~ .)

```

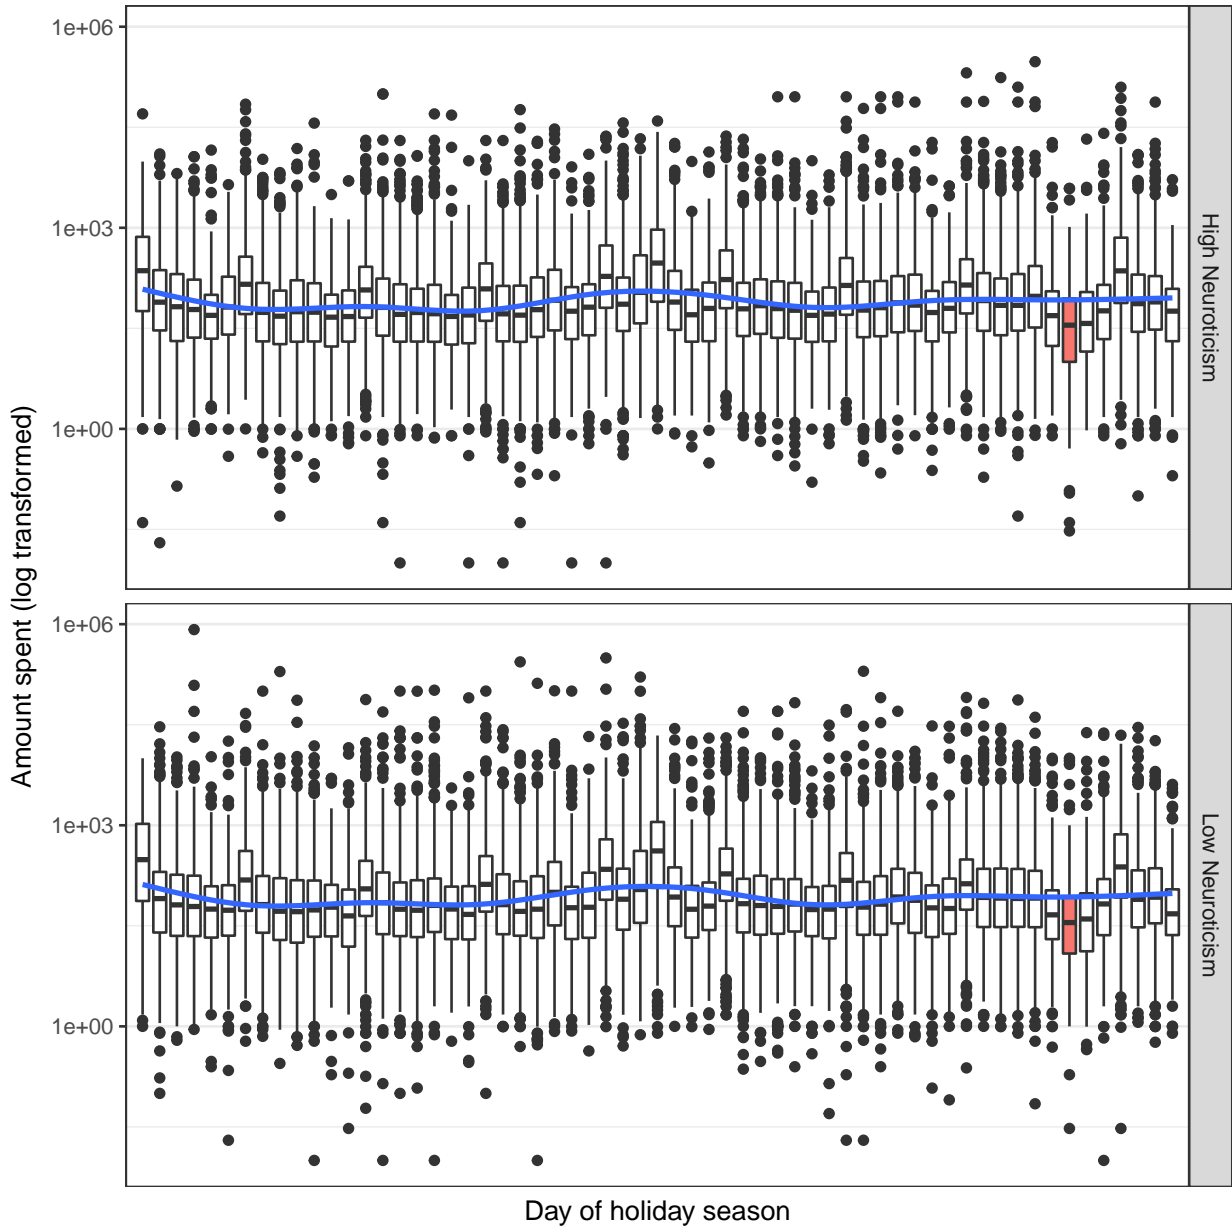

```

holiday_novdec %>%
  filter(!is.na(z.latent.o)) %>%
  mutate(open.group = ifelse(z.latent.o > 0, "High Openness", "Low Openness")) %>%
  mutate(Christmas = ifelse(transactiondate == "2016-12-25", "Christmas", "")) %>%
  ggplot(aes(x = days, y = amount, fill = Christmas)) +
  geom_boxplot(aes(group = cut_width(days, 1))) +

```

```
geom_smooth(se = F) +  
scale_y_log10("Amount spent (log transformed)") +  
scale_x_discrete("Day of holiday season") +  
scale_fill_manual(values = c("white", "#F8766D")) +  
theme_bw()+  
theme(legend.position = "none")+  
facet_grid(open.group ~ .)
```

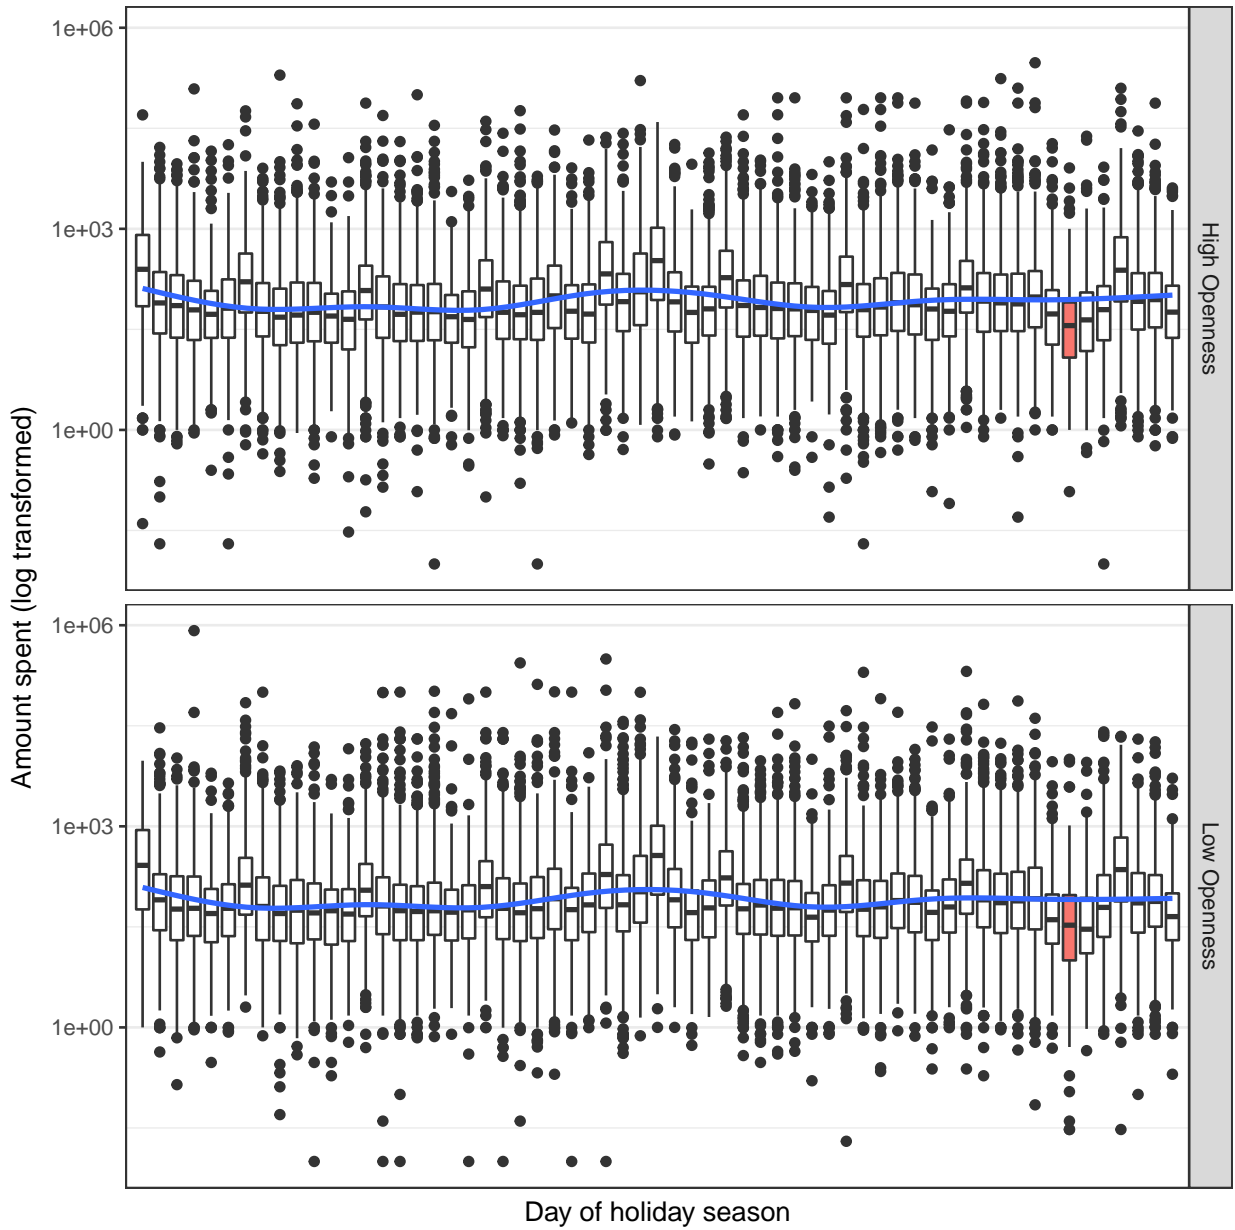

## 5 Reviewed Results

The results of these analyses were submitted to the journal and peer reviewed. Parts of the analyses were adjusted, per the suggestions of the reviewers and editor (those changes are in the section 3). These are the original results.

For these analyses, we log-transformed spending and income. We also used estimates of credit and spending covariates based on days outside the holiday season. The results of the main analyses are shown in Table 7. The results of the longitudinal analyses are in Table ??

```
rr.lm <- lm(log(NovDec_spending) ~ z_age + male + log_credit +
           log_spend + z_extra + z_agree + z_con + z_neur + z_open,
           data = holiday_wide)
```

```
stargazer(rr.lm,
           title = "Do personality traits predict holiday spending? (peer-reviewed)",
           intercept.bottom = F, intercept.top=T,
           label = "rr.main",
           ci = TRUE, digits=2, header = FALSE,
           star.cutoffs = c(.05,.01,.001))
```

```
ex3.lmer <- lmer(log(amount + 1) ~ days + z_age + male + log_credit + log_spend +
                z_extra + z_agree + z_con + z_neur + z_open +
                days*z_age + days*male + days*log_credit + days*log_spend +
                days*z_extra + days*z_agree + days*z_con + days*z_neur + days*z_open +
                (1 + days |userreference),
                data = holiday_novdec,
                control=lmerControl(optimizer = "nloptwrap", calc.derivs = FALSE))
```

```
stargazer(ex3.lmer,
           title = "Do personality traits predict holiday spending trajectories? (exploratory, new covar",
           label = "rr.long",
           font.size = "footnotesize", single.row = TRUE, header = FALSE,
           intercept.bottom = F, intercept.top=T, ci = TRUE, digits=2, no.space = T,
           star.cutoffs = c(.05,.01,.001))
```



| <i>Dependent variable:</i> |                               |
|----------------------------|-------------------------------|
| log(NovDec_spending)       |                               |
| Constant                   | 1.81***<br>(1.39, 2.23)       |
| z_age                      | -0.004<br>(-0.05, 0.04)       |
| male                       | 0.11*<br>(0.02, 0.19)         |
| log_credit                 | 0.06***<br>(0.04, 0.07)       |
| log_spend                  | 0.72***<br>(0.68, 0.77)       |
| z_extra                    | 0.02<br>(-0.02, 0.06)         |
| z_agree                    | -0.02<br>(-0.06, 0.02)        |
| z_con                      | 0.04*<br>(0.0005, 0.09)       |
| z_neur                     | -0.06**<br>(-0.10, -0.01)     |
| z_open                     | -0.08***<br>(-0.12, -0.03)    |
| Observations               | 2,118                         |
| R <sup>2</sup>             | 0.43                          |
| Adjusted R <sup>2</sup>    | 0.43                          |
| Residual Std. Error        | 0.96 (df = 2108)              |
| F Statistic                | 176.84*** (df = 9; 2108)      |
| <i>Note:</i>               | *p<0.05; **p<0.01; ***p<0.001 |

Table 7: Do personality traits predict holiday spending? (peer-reviewed)

|                     | <i>Dependent variable:</i>    |
|---------------------|-------------------------------|
|                     | log(amount + 1)               |
| Constant            | -0.14 (-0.47, 0.18)           |
| days                | 0.02*** (0.01, 0.02)          |
| z_age               | 0.11*** (0.08, 0.14)          |
| male                | 0.01 (-0.05, 0.07)            |
| log_credit          | 0.02*** (0.01, 0.03)          |
| log_spend           | 0.45*** (0.42, 0.49)          |
| z_extra             | 0.02 (-0.01, 0.05)            |
| z_agree             | -0.005 (-0.03, 0.02)          |
| z_con               | 0.01 (-0.02, 0.04)            |
| z_neur              | -0.02 (-0.05, 0.01)           |
| z_open              | -0.02 (-0.05, 0.01)           |
| days:z_age          | -0.0002 (-0.001, 0.001)       |
| days:male           | -0.0001 (-0.001, 0.001)       |
| days:log_credit     | -0.0004*** (-0.001, -0.0002)  |
| days:log_spend      | -0.001*** (-0.002, -0.001)    |
| days:z_extra        | 0.0004 (-0.0003, 0.001)       |
| days:z_agree        | 0.0000 (-0.001, 0.001)        |
| days:z_con          | 0.0000 (-0.001, 0.001)        |
| days:z_neur         | 0.0002 (-0.0005, 0.001)       |
| days:z_open         | 0.0001 (-0.001, 0.001)        |
| Observations        | 86,191                        |
| Log Likelihood      | -157,926.50                   |
| Akaike Inf. Crit.   | 315,900.90                    |
| Bayesian Inf. Crit. | 316,125.60                    |
| <i>Note:</i>        | *p<0.05; **p<0.01; ***p<0.001 |

Table 8: Do personality traits predict holiday spending trajectories? (exploratory, new covariates and log transformed)

## 6 Pre-registered Analyses

These are the results of the analyses that were originally pre-registered. We deviated from the preregistration for a few reasons. First, we did not consider that the spending and income variables would be highly skewed. Second, we were unaware that participants did not participate in the study for equal amounts of time. These results are not included in the published manuscript.

### 6.1 Question 1: Does personality predict the amount of spending during the holidays?

We calculate a standardized credit variable, representing total income.

```
holiday_wide = holiday_wide %>%
  mutate(z_credit = as.numeric(scale(total_credit)))

holiday_novdec = holiday_wide %>%
  dplyr::select(userreference, z_credit) %>%
  full_join(holiday_novdec)

## Joining, by = "userreference"
```

We also created a variable to represent the ratio of spending during the holiday season to the whole year's spending for each person. This was used in beta regression models.

```
holiday_wide = holiday_wide %>%
  mutate(
```

```
# calculate ratio of yearly spending to yearly income
yearlyspending_ratio = yearly_spending/total_credit,
# calculate ratio of Nov/Dec spending to total yearly spending
NovDecspending_ratio = NovDec_spending/yearly_spending)
```

We predict total amount of spending during the holiday season by personality traits (average scores), age, gender, income (credit) and spending. We use both a linear model and a beta-regression model. Results of these models are in Table 9.

```
prereg.q1.lm <- lm(NovDec_spending ~ z_age + male + z_credit + z_yearlyspending +
  z_extra + z_agree + z_con + z_neur + z_open,
  data = holiday_wide)
```

```
prereg.q1.br <- betareg(NovDecspending_ratio ~ z_age + male + z_credit + z_yearlyspending +
  z_extra + z_agree + z_con + z_neur + z_open | 1,
  data = holiday_wide)
```

```
stargazer(prereg.q1.lm, prereg.q1.br,
  title = "Do personality traits predict holiday spending? (pre-registered)",
  intercept.bottom = F, intercept.top=T,
  ci = TRUE, digits=2, header = FALSE, label = "pr.tab1",
  star.cutoffs = c(.05, .01, .001))
```

## 6.2 Question 2: Does personality predict changes in spending across the holiday season?

Next we examine how personality traits may predict changes in spending. Results of this model are shown in Table 10.

```
q2.lmer <- lmer(amount ~ days + z_age + male + z_credit + z_yearlyspending +
  z_extra + z_agree + z_con + z_neur + z_open +
  days*z_age + days*male + days*z_credit + days*z_yearlyspending +
  days*z_extra + days*z_agree + days*z_con + days*z_neur + days*z_open +
  (1 + days |userreference),
  data = holiday_novdec,
  control=lmerControl(optimizer = "nloptwrap", calc.derivs = FALSE))
```

```
stargazer(q2.lmer, title = "Do personality traits predict holiday spending trajectories? (pre-registered)",
  font.size = "footnotesize", header = FALSE,
  intercept.bottom = F, intercept.top=T, ci = TRUE, digits=2, no.space = T,
  label = "pr.tab2",
  star.cutoffs = c(.05, .01, .001))
```

Here we plot the effect of extraversion on the slope.

```
plot_model(q2.lmer, type = "pred", term = "z_extra",
  axis.title = c("Extraversion (standardized)", "Rate of change in spending"))
```

|                         | <i>Dependent variable:</i>             |                            |
|-------------------------|----------------------------------------|----------------------------|
|                         | NovDec_spending                        | NovDecspending_ratio       |
|                         | <i>OLS</i>                             | <i>beta</i>                |
|                         | (1)                                    | (2)                        |
| Constant                | 18,250.86***<br>(15,367.66, 21,134.07) | -1.58***<br>(-1.62, -1.55) |
| z_age                   | -3,032.66**<br>(-5,234.36, -830.97)    | -0.03*<br>(-0.06, -0.001)  |
| male                    | -1,623.18<br>(-5,985.76, 2,739.40)     | 0.003<br>(-0.05, 0.06)     |
| z_credit                | -1,512.16<br>(-3,729.08, 704.76)       | 0.01<br>(-0.02, 0.04)      |
| z_yearlyspending        | 49,326.78***<br>(47,077.47, 51,576.08) | -0.03*<br>(-0.06, -0.0003) |
| z_extra                 | -3,653.67**<br>(-5,903.09, -1,404.26)  | -0.003<br>(-0.03, 0.02)    |
| z_agree                 | 742.32<br>(-1,443.18, 2,927.82)        | 0.01<br>(-0.02, 0.04)      |
| z_con                   | -185.62<br>(-2,425.08, 2,053.85)       | 0.02<br>(-0.01, 0.05)      |
| z_neur                  | 102.44<br>(-2,170.56, 2,375.44)        | -0.02<br>(-0.05, 0.01)     |
| z_open                  | 92.84<br>(-2,155.30, 2,340.98)         | -0.02<br>(-0.05, 0.01)     |
| Observations            | 2,118                                  | 2,118                      |
| R <sup>2</sup>          | 0.48                                   | 0.01                       |
| Adjusted R <sup>2</sup> | 0.48                                   |                            |
| Log Likelihood          |                                        | 2,245.94                   |
| Residual Std. Error     | 49,902.12 (df = 2108)                  |                            |
| F Statistic             | 220.58*** (df = 9; 2108)               |                            |

*Note:* \*p<0.05; \*\*p<0.01; \*\*\*p<0.001

Table 9: Do personality traits predict holiday spending? (pre-registered)

|                       | <i>Dependent variable:</i>          |
|-----------------------|-------------------------------------|
|                       | amount                              |
| Constant              | 383.53***<br>(261.28, 505.78)       |
| days                  | 0.57<br>(-2.51, 3.65)               |
| z_age                 | -105.04*<br>(-199.36, -10.72)       |
| male                  | -63.83<br>(-246.63, 118.97)         |
| z_credit              | 87.28<br>(-1.31, 175.88)            |
| z_yearlyspending      | 1,216.77***<br>(1,126.41, 1,307.12) |
| z_extra               | -167.71***<br>(-262.56, -72.86)     |
| z_agree               | 29.79<br>(-62.01, 121.59)           |
| z_con                 | 45.80<br>(-48.60, 140.21)           |
| z_neur                | -16.70<br>(-112.50, 79.11)          |
| z_open                | 9.89<br>(-84.79, 104.57)            |
| days:z_age            | 1.96<br>(-0.42, 4.33)               |
| days:male             | 0.39<br>(-4.20, 4.98)               |
| days:z_credit         | -3.82***<br>(-6.03, -1.62)          |
| days:z_yearlyspending | -9.87***<br>(-12.10, -7.64)         |
| days:z_extra          | 3.28**<br>(0.90, 5.66)              |
| days:z_agree          | -0.52<br>(-2.82, 1.78)              |
| days:z_con            | -1.42<br>(-3.79, 0.95)              |
| days:z_neur           | 0.86<br>(-1.55, 3.26)               |
| days:z_open           | -0.20<br>(-2.58, 2.18)              |
| Observations          | 86,191                              |
| Log Likelihood        | -840,693.80                         |
| Akaike Inf. Crit.     | 1,681,436.00                        |
| Bayesian Inf. Crit.   | 1,681,660.00                        |

*Note:* \*p<0.05; \*\*p<0.01; \*\*\*p<0.001

Table 10: Do personality traits predict holiday spending trajectories? (pre-registered)

Predicted values for amount

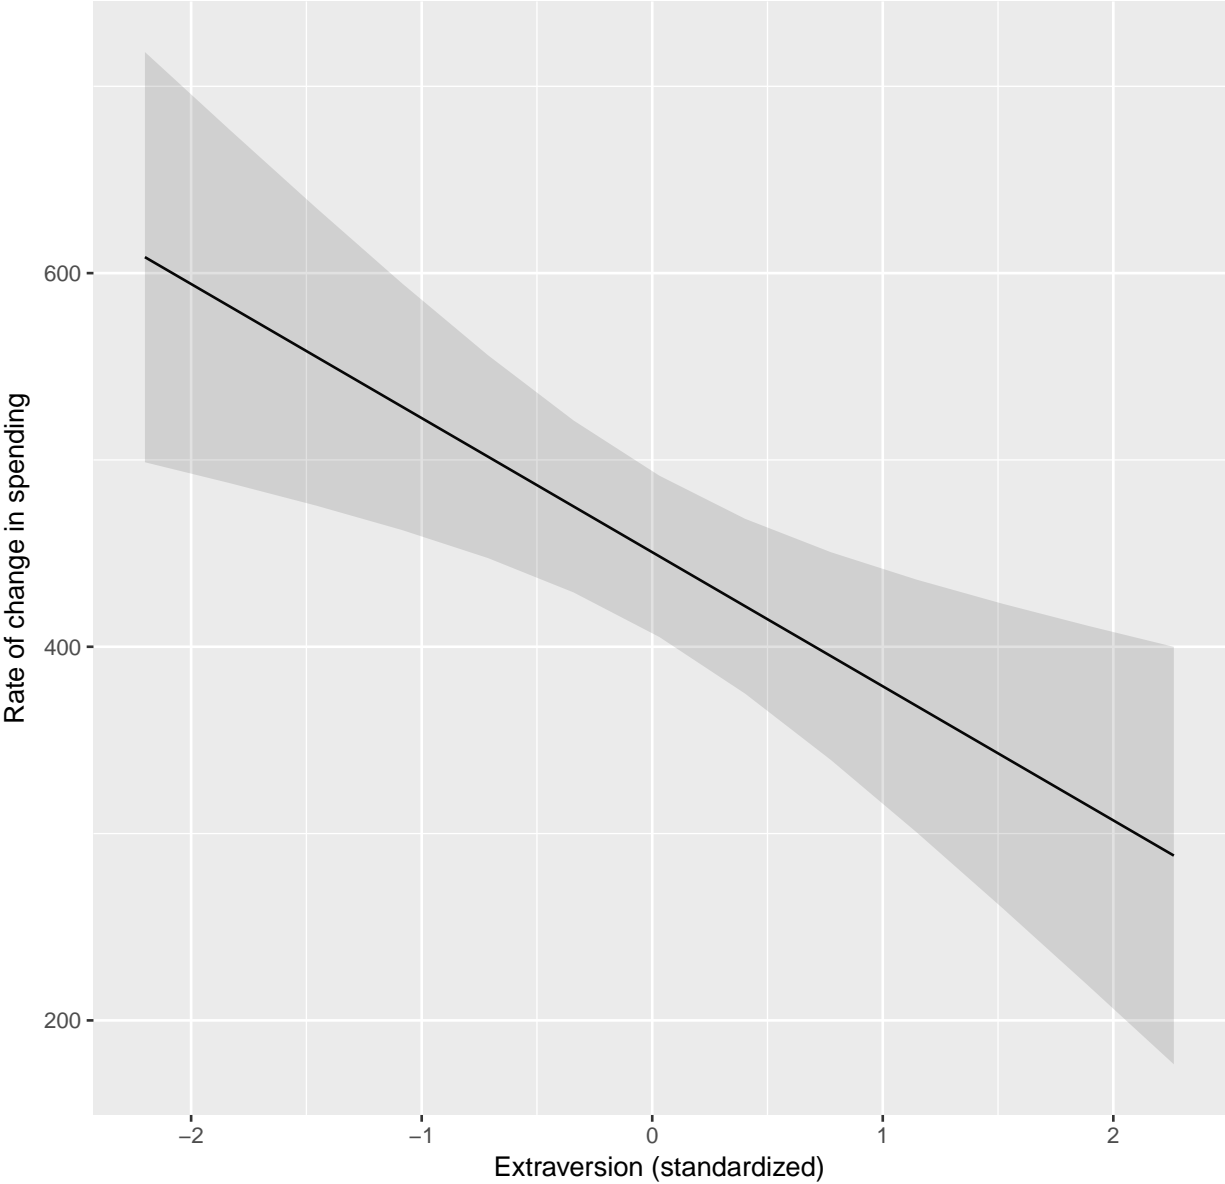

## 7 Exploratory analyses

After running the pre-registered analyses, we were troubled by some of the results/issues with the data. We tested a few methods of re-analyzing the data, which are documented here. These results are not included in the published manuscript.

### 7.1 Recalculated covariates

After running the preregistered analyses, it became clear that not all participants had provided data for the full year. Above, we calculated adjusted credit and spending amounts by calculating the average daily credit and debit and multiplying to estimate bi-monthly credit and spending. Here we use those values as covariates, instead of the ‘z\_credit’ and ‘z\_yearlyspending’ variables we preregistered. Results of these models are in Tables 11 and 12.

```
ex1.lm <- lm(NovDec_spending ~ z_age + male + z_est_bi_credit + z_est_bi_spend +
            z_extra + z_agree + z_con + z_neur + z_open,
            data = holiday_wide)
```

```
ex1.br <- betareg(NovDecspending_ratio ~ z_age + male + z_est_bi_credit + z_est_bi_spend +
                z_extra + z_agree + z_con + z_neur + z_open | 1,
                data = holiday_wide)
```

```
stargazer(ex1.lm, ex1.br,
          title = "Do personality traits predict holiday spending? (exploratory, new covariates)",
          intercept.bottom = F, intercept.top=T, ci = TRUE, digits=2, header = FALSE, label = "ex1:tab",
          star.cutoffs = c(.05,.01,.001))
```

### 7.2 Research Question 2

```
ex1.lmer <- lmer(amount ~ days + z_age + male + z_est_bi_credit + z_est_bi_spend +
                z_extra + z_agree + z_con + z_neur + z_open +
                days*z_age + days*male + days*z_est_bi_credit + days*z_est_bi_spend +
                days*z_extra + days*z_agree + days*z_con + days*z_neur + days*z_open +
                (1 + days |userreference),
                data = holiday_novdec,
                control=lmerControl(optimizer = "nloptwrap", calc.derivs = FALSE))
```

```
stargazer(ex1.lmer, title = "Do personality traits predict holiday spending trajectories? (exploratory,
font.size = "footnotesize", header = FALSE,label = "ex1:tab2",
intercept.bottom = F, intercept.top=T, ci = TRUE, digits=2, no.space = T,
star.cutoffs = c(.05,.01,.001))
```

### 7.3 Fractional binomial

We also thought that perhaps our ratio outcomes were better served by using a fractional binomial model, instead of beta regression. We attempted these models in Table 13.

```
ex2.lm1 <- glm(NovDecspending_ratio ~ z_age + male + z_credit + z_yearlyspending +
              z_extra + z_agree + z_con + z_neur + z_open,
              data = holiday_wide, family = quasibinomial(link=logit))
ex2.lm2 <- glm(NovDecspending_ratio ~ z_age + male + z_est_bi_credit + z_est_bi_spend +
              z_extra + z_agree + z_con + z_neur + z_open,
              data = holiday_wide, family = quasibinomial(link=logit))
```

|                         | <i>Dependent variable:</i>             |                            |
|-------------------------|----------------------------------------|----------------------------|
|                         | NovDec_spending                        | NovDecspending_ratio       |
|                         | <i>OLS</i>                             | <i>beta</i>                |
|                         | (1)                                    | (2)                        |
| Constant                | 16,650.64***<br>(12,749.44, 20,551.83) | -1.59***<br>(-1.63, -1.56) |
| z_age                   | 3,001.81*<br>(12.83, 5,990.78)         | -0.01<br>(-0.03, 0.02)     |
| male                    | 1,912.35<br>(-3,988.75, 7,813.45)      | 0.01<br>(-0.04, 0.07)      |
| z_est_bi_credit         | 6,910.28***<br>(3,957.60, 9,862.97)    | -0.02<br>(-0.05, 0.01)     |
| z_est_bi_spend          | 12,096.00***<br>(9,095.97, 15,096.03)  | -0.11***<br>(-0.15, -0.08) |
| z_extra                 | -2,437.13<br>(-5,488.32, 614.07)       | 0.01<br>(-0.02, 0.03)      |
| z_agree                 | -506.90<br>(-3,464.71, 2,450.90)       | 0.01<br>(-0.02, 0.03)      |
| z_con                   | 1,982.91<br>(-1,050.31, 5,016.12)      | 0.03*<br>(0.001, 0.05)     |
| z_neur                  | -1,054.54<br>(-4,130.34, 2,021.27)     | -0.01<br>(-0.04, 0.01)     |
| z_open                  | -577.64<br>(-3,620.05, 2,464.78)       | -0.02<br>(-0.05, 0.01)     |
| Observations            | 2,118                                  | 2,118                      |
| R <sup>2</sup>          | 0.06                                   | 0.04                       |
| Adjusted R <sup>2</sup> | 0.05                                   |                            |
| Log Likelihood          |                                        | 2,276.27                   |
| Residual Std. Error     | 67,539.42 (df = 2108)                  |                            |
| F Statistic             | 14.06*** (df = 9; 2108)                |                            |

*Note:* \*p<0.05; \*\*p<0.01; \*\*\*p<0.001

Table 11: Do personality traits predict holiday spending? (exploratory, new covariates)



|                      | <i>Dependent variable:</i>    |
|----------------------|-------------------------------|
|                      | amount                        |
| Constant             | 381.36***<br>(237.53, 525.20) |
| days                 | 0.84<br>(-2.40, 4.08)         |
| z_age                | 38.09<br>(-73.01, 149.19)     |
| male                 | 15.35<br>(-200.13, 230.84)    |
| z_est_bi_credit      | 306.06***<br>(196.71, 415.41) |
| z_est_bi_spend       | 387.16***<br>(275.76, 498.55) |
| z_extra              | -143.08*<br>(-255.08, -31.08) |
| z_agree              | -0.50<br>(-108.70, 107.70)    |
| z_con                | 93.04<br>(-18.24, 204.32)     |
| z_neur               | -45.87<br>(-158.70, 66.96)    |
| z_open               | -5.31<br>(-116.86, 106.23)    |
| days:z_age           | 1.01<br>(-1.49, 3.52)         |
| days:male            | -0.25<br>(-5.08, 4.58)        |
| days:z_est_bi_credit | -5.63***<br>(-8.06, -3.20)    |
| days:z_est_bi_spend  | -3.73**<br>(-6.22, -1.24)     |
| days:z_extra         | 3.11*<br>(0.60, 5.62)         |
| days:z_agree         | -0.31<br>(-2.74, 2.11)        |
| days:z_con           | -1.72<br>(-4.22, 0.78)        |
| days:z_neur          | 1.07<br>(-1.47, 3.60)         |
| days:z_open          | -0.05<br>(-2.56, 2.45)        |
| Observations         | 86,191                        |
| Log Likelihood       | -841,276.60                   |
| Akaike Inf. Crit.    | 1,682,601.00                  |
| Bayesian Inf. Crit.  | 1,682,826.00                  |

*Note:* \*p<0.05; \*\*p<0.01; \*\*\*p<0.001

Table 12: Do personality traits predict holiday spending trajectories? (exploratory, new covariates)

```

ex2.glmer1 <- glmer(daily_ratio ~ days + z_age + male + z_credit + z_yearlyspending +
  z_extra + z_agree + z_con + z_neur + z_open +
  days*z_age + days*male + days*z_est_bi_credit + days*z_est_bi_spend +
  days*z_extra + days*z_agree + days*z_con + days*z_neur + days*z_open +
  (1 + days |userreference), weights = holiday_novdec$NovDec_spending,
  family = "binomial",
  data = holiday_novdec,
  control=glmerControl(optimizer = "nloptwrap", calc.derivs = FALSE))

## Warning in eval(family$initialize, rho): non-integer #successes in a binomial glm!

```

```

stargazer(ex2.lm1, ex2.lm2, ex2.glmer1,
  title = "Do personality traits predict holiday spending trajectories? (exploratory, new covar",
  font.size = "footnotesize", header = FALSE, label = "ex2:tab",
  intercept.bottom = F, intercept.top=T, ci = TRUE, digits=2, no.space = T,
  star.cutoffs = c(.05,.01,.001))

```

|                      | <i>Dependent variable:</i>                 |                            |                                             |
|----------------------|--------------------------------------------|----------------------------|---------------------------------------------|
|                      | NovDecspending_ratio                       |                            | daily_ratio                                 |
|                      | <i>glm: quasibinomial<br/>link = logit</i> |                            | <i>generalized linear<br/>mixed-effects</i> |
|                      | (1)                                        | (2)                        | (3)                                         |
| Constant             | -1.59***<br>(-1.63, -1.55)                 | -1.60***<br>(-1.63, -1.56) | -3.64***<br>(-3.71, -3.56)                  |
| days                 |                                            |                            | 0.002<br>(-0.001, 0.004)                    |
| z_age                | -0.02<br>(-0.05, 0.005)                    | -0.002<br>(-0.03, 0.03)    | 0.02<br>(-0.04, 0.07)                       |
| male                 | -0.01<br>(-0.07, 0.05)                     | -0.004<br>(-0.06, 0.05)    | -0.11*<br>(-0.22, -0.01)                    |
| z_credit             | -0.0003<br>(-0.03, 0.03)                   |                            | -0.31***<br>(-0.41, -0.20)                  |
| z_yearlyspending     | 0.02<br>(-0.01, 0.05)                      |                            | -0.18***<br>(-0.22, -0.13)                  |
| z_est_bi_credit      |                                            | 0.01<br>(-0.01, 0.04)      | 0.34***<br>(0.22, 0.46)                     |
| z_est_bi_spend       |                                            | -0.11***<br>(-0.15, -0.07) | 0.10**<br>(0.04, 0.16)                      |
| days:z_age           |                                            |                            | -0.0001<br>(-0.002, 0.002)                  |
| days:male            |                                            |                            | -0.001<br>(-0.005, 0.003)                   |
| days:z_est_bi_credit |                                            |                            | -0.002<br>(-0.004, 0.0000)                  |
| days:z_est_bi_spend  |                                            |                            | -0.0003<br>(-0.002, 0.002)                  |
| days:z_extra         |                                            |                            | 0.001<br>(-0.001, 0.003)                    |
| days:z_agree         |                                            |                            | -0.0005<br>(-0.002, 0.002)                  |
| days:z_con           |                                            |                            | -0.0003<br>(-0.002, 0.002)                  |
| days:z_neur          |                                            |                            | -0.0000<br>(-0.002, 0.002)                  |
| days:z_open          |                                            |                            | 0.001<br>(-0.001, 0.003)                    |
| z_extra              | -0.01<br>(-0.03, 0.02)                     | 0.004<br>(-0.03, 0.03)     | -0.06*<br>(-0.12, -0.01)                    |
| z_agree              | 0.01<br>(-0.02, 0.04)                      | 0.01<br>(-0.02, 0.04)      | 0.01<br>(-0.05, 0.06)                       |
| z_con                | 0.02<br>(-0.01, 0.05)                      | 0.03<br>(-0.004, 0.06)     | -0.01<br>(-0.07, 0.04)                      |
| z_neur               | -0.01<br>(-0.04, 0.02)                     | -0.01<br>(-0.04, 0.02)     | 0.02<br>(-0.04, 0.08)                       |
| z_open               | -0.01<br>(-0.04, 0.02)                     | -0.01<br>(-0.04, 0.02)     | 0.01<br>(-0.04, 0.07)                       |
| Observations         | 2,118                                      | 2,118                      | 86,191                                      |
| Log Likelihood       |                                            |                            | -48,398,255.00                              |
| Akaike Inf. Crit.    |                                            |                            | 96,796,561.00                               |
| Bayesian Inf. Crit.  |                                            |                            | 96,796,795.00                               |

*Note:* \*p<0.05; \*\*p<0.01; \*\*\*p<0.001

Table 13: Do personality traits predict holiday spending trajectories? (exploratory, new covariates and fractional binomial)

## 8 Session Information

The analyses displayed here were run on a computer with the following settings:

```
## setting value
## version R version 3.4.4 (2018-03-15)
## system x86_64, darwin15.6.0
## ui X11
## language (EN)
## collate en_US.UTF-8
## tz America/Chicago
## date 2018-06-19
```

The following packages were used:

| package    | * version | date       | source         |
|------------|-----------|------------|----------------|
| abind      | 1.4-5     | 2016-07-21 | CRAN (R 3.4.0) |
| apaTables  | * 1.5.1   | 2017-06-20 | CRAN (R 3.4.1) |
| arm        | 1.9-3     | 2016-11-27 | CRAN (R 3.4.0) |
| assertthat | 0.2.0     | 2017-04-11 | CRAN (R 3.4.0) |
| backports  | 1.1.2     | 2017-12-13 | cran (@1.1.2)  |
| base       | * 3.4.4   | 2018-03-15 | local          |
| bayesplot  | 1.4.0     | 2017-09-12 | CRAN (R 3.4.2) |
| betareg    | * 3.1-0   | 2016-08-06 | CRAN (R 3.4.0) |
| bindr      | 0.1.1     | 2018-03-13 | cran (@0.1.1)  |
| bindrcpp   | * 0.2.2   | 2018-03-29 | cran (@0.2.2)  |
| blme       | 1.0-4     | 2015-06-14 | CRAN (R 3.4.0) |
| broom      | 0.4.4     | 2018-03-29 | cran (@0.4.4)  |
| carData    | 3.0-0     | 2017-08-28 | CRAN (R 3.4.1) |
| cellranger | 1.1.0     | 2016-07-27 | CRAN (R 3.4.0) |
| cli        | 1.0.0     | 2017-11-05 | CRAN (R 3.4.2) |
| coda       | 0.19-1    | 2016-12-08 | CRAN (R 3.4.0) |
| codetools  | 0.2-15    | 2016-10-05 | CRAN (R 3.4.4) |
| coin       | 1.2-1     | 2017-07-17 | CRAN (R 3.4.1) |
| colorspace | 1.3-2     | 2016-12-14 | CRAN (R 3.4.0) |
| compiler   | 3.4.4     | 2018-03-15 | local          |
| crayon     | 1.3.4     | 2017-09-16 | CRAN (R 3.4.1) |
| datasets   | * 3.4.4   | 2018-03-15 | local          |
| devtools   | * 1.13.4  | 2017-11-09 | CRAN (R 3.4.2) |
| digest     | 0.6.15    | 2018-01-28 | cran (@0.6.15) |
| dplyr      | * 0.7.5   | 2018-05-19 | cran (@0.7.5)  |
| DT         | 0.2       | 2016-08-09 | CRAN (R 3.4.0) |
| effects    | 4.0-0     | 2017-09-15 | CRAN (R 3.4.1) |
| evaluate   | 0.10.1    | 2017-06-24 | CRAN (R 3.4.1) |
| flexmix    | 2.3-14    | 2017-04-28 | CRAN (R 3.4.0) |
| forcats    | * 0.2.0   | 2017-01-23 | CRAN (R 3.4.0) |
| foreign    | 0.8-69    | 2017-06-22 | CRAN (R 3.4.4) |
| formatR    | 1.5       | 2017-04-25 | CRAN (R 3.4.0) |
| Formula    | 1.2-2     | 2017-07-10 | CRAN (R 3.4.1) |
| ggeffects  | 0.2.2     | 2017-09-20 | CRAN (R 3.4.2) |

|             |               |            |                              |
|-------------|---------------|------------|------------------------------|
| ggplot2     | * 2.2.1       | 2016-12-30 | CRAN (R 3.4.0)               |
| glmmTMB     | * 0.1.4       | 2017-10-26 | CRAN (R 3.4.2)               |
| glue        | 1.2.0         | 2017-10-29 | CRAN (R 3.4.2)               |
| graphics    | * 3.4.4       | 2018-03-15 | local                        |
| grDevices   | * 3.4.4       | 2018-03-15 | local                        |
| grid        | 3.4.4         | 2018-03-15 | local                        |
| gridExtra   | * 2.3         | 2017-09-09 | CRAN (R 3.4.1)               |
| gtable      | 0.2.0         | 2016-02-26 | CRAN (R 3.4.0)               |
| haven       | 1.1.0         | 2017-07-09 | CRAN (R 3.4.0)               |
| highr       | 0.6           | 2016-05-09 | CRAN (R 3.4.0)               |
| hms         | 0.3           | 2016-11-22 | CRAN (R 3.4.0)               |
| htmltools   | 0.3.6         | 2017-04-28 | CRAN (R 3.4.0)               |
| htmlwidgets | 0.9           | 2017-07-10 | CRAN (R 3.4.0)               |
| httpuv      | 1.4.3         | 2018-05-10 | cran (@1.4.3)                |
| httr        | 1.3.1         | 2017-08-20 | CRAN (R 3.4.1)               |
| jsonlite    | 1.5           | 2017-06-01 | CRAN (R 3.4.0)               |
| kableExtra  | * 0.7.0       | 2018-01-15 | CRAN (R 3.4.3)               |
| knitr       | * 1.20        | 2018-02-20 | cran (@1.20)                 |
| labeling    | 0.3           | 2014-08-23 | CRAN (R 3.4.0)               |
| later       | 0.7.2         | 2018-05-01 | cran (@0.7.2)                |
| lattice     | 0.20-35       | 2017-03-25 | CRAN (R 3.4.4)               |
| lavaan      | * 0.5-23.1097 | 2017-02-24 | CRAN (R 3.4.0)               |
| lazyeval    | 0.2.1         | 2017-10-29 | CRAN (R 3.4.2)               |
| lme4        | * 1.1-14      | 2017-09-27 | CRAN (R 3.4.2)               |
| lmtest      | 0.9-35        | 2017-02-11 | CRAN (R 3.4.0)               |
| lubridate   | 1.7.1         | 2017-11-03 | CRAN (R 3.4.2)               |
| magrittr    | 1.5           | 2014-11-22 | CRAN (R 3.4.0)               |
| MASS        | 7.3-49        | 2018-02-23 | CRAN (R 3.4.4)               |
| Matrix      | * 1.2-12      | 2017-11-30 | CRAN (R 3.4.4)               |
| memoise     | 1.1.0         | 2017-04-21 | CRAN (R 3.4.0)               |
| merTools    | 0.3.0         | 2016-12-12 | CRAN (R 3.4.0)               |
| methods     | * 3.4.4       | 2018-03-15 | local                        |
| mgcv        | 1.8-23        | 2018-01-21 | CRAN (R 3.4.4)               |
| mime        | 0.5           | 2016-07-07 | CRAN (R 3.4.0)               |
| minqa       | 1.2.4         | 2014-10-09 | CRAN (R 3.4.0)               |
| mnormt      | 1.5-5         | 2016-10-15 | CRAN (R 3.4.0)               |
| modelr      | 0.1.1         | 2017-07-24 | CRAN (R 3.4.1)               |
| modeltools  | 0.2-21        | 2013-09-02 | CRAN (R 3.4.0)               |
| multcomp    | 1.4-8         | 2017-11-08 | CRAN (R 3.4.2)               |
| munsell     | 0.4.3         | 2016-02-13 | CRAN (R 3.4.0)               |
| mvtnorm     | 1.0-6         | 2017-03-02 | CRAN (R 3.4.0)               |
| nlme        | 3.1-131.1     | 2018-02-16 | CRAN (R 3.4.4)               |
| nloptr      | 1.0.4         | 2014-08-04 | CRAN (R 3.4.0)               |
| nnet        | 7.3-12        | 2016-02-02 | CRAN (R 3.4.4)               |
| papaja      | * 0.1.0.9492  | 2017-10-14 | Github (crsh/papaja@ede6845) |
| parallel    | 3.4.4         | 2018-03-15 | local                        |
| pbivnorm    | 0.6.0         | 2015-01-23 | CRAN (R 3.4.0)               |

|              |         |            |                 |
|--------------|---------|------------|-----------------|
| pillar       | 1.2.3   | 2018-05-25 | cran (@1.2.3)   |
| pkgconfig    | 2.0.1   | 2017-03-21 | CRAN (R 3.4.0)  |
| plyr         | 1.8.4   | 2016-06-08 | CRAN (R 3.4.0)  |
| prediction   | 0.2.0   | 2017-04-19 | CRAN (R 3.4.0)  |
| promises     | 1.0.1   | 2018-04-13 | cran (@1.0.1)   |
| psych        | * 1.8.4 | 2018-05-06 | cran (@1.8.4)   |
| purrr        | * 0.2.5 | 2018-05-29 | cran (@0.2.5)   |
| pwr          | 1.2-1   | 2017-03-25 | CRAN (R 3.4.0)  |
| quadprog     | 1.5-5   | 2013-04-17 | CRAN (R 3.4.0)  |
| R6           | 2.2.2   | 2017-06-17 | CRAN (R 3.4.0)  |
| RColorBrewer | 1.1-2   | 2014-12-07 | CRAN (R 3.4.0)  |
| Rcpp         | 0.12.17 | 2018-05-18 | cran (@0.12.17) |
| readr        | * 1.1.1 | 2017-05-16 | CRAN (R 3.4.0)  |
| readxl       | 1.0.0   | 2017-04-18 | CRAN (R 3.4.0)  |
| reshape2     | 1.4.3   | 2017-12-11 | cran (@1.4.3)   |
| rlang        | 0.2.1   | 2018-05-30 | cran (@0.2.1)   |
| rmarkdown    | 1.9     | 2018-03-01 | cran (@1.9)     |
| rprojroot    | 1.3-2   | 2018-01-03 | cran (@1.3-2)   |
| rstudioapi   | 0.7     | 2017-09-07 | CRAN (R 3.4.1)  |
| rvest        | 0.3.2   | 2016-06-17 | CRAN (R 3.4.0)  |
| sandwich     | 2.4-0   | 2017-07-26 | CRAN (R 3.4.1)  |
| scales       | 0.5.0   | 2017-08-24 | CRAN (R 3.4.1)  |
| shiny        | 1.1.0   | 2018-05-17 | cran (@1.1.0)   |
| sjlabelled   | 1.0.5   | 2017-11-09 | CRAN (R 3.4.2)  |
| sjmisc       | 2.6.2   | 2017-10-26 | CRAN (R 3.4.2)  |
| sjPlot       | * 2.4.0 | 2017-10-19 | CRAN (R 3.4.2)  |
| sjstats      | 0.12.0  | 2017-10-16 | CRAN (R 3.4.2)  |
| snakecase    | 0.5.1   | 2017-09-20 | CRAN (R 3.4.2)  |
| splines      | 3.4.4   | 2018-03-15 | local           |
| stargazer    | * 5.2   | 2015-07-14 | CRAN (R 3.4.0)  |
| stats        | * 3.4.4 | 2018-03-15 | local           |
| stats4       | 3.4.4   | 2018-03-15 | local           |
| stringdist   | 0.9.4.6 | 2017-07-31 | CRAN (R 3.4.1)  |
| stringi      | 1.2.2   | 2018-05-02 | cran (@1.2.2)   |
| stringr      | * 1.3.1 | 2018-05-10 | cran (@1.3.1)   |
| survey       | 3.32-1  | 2017-06-22 | CRAN (R 3.4.1)  |
| survival     | 2.41-3  | 2017-04-04 | CRAN (R 3.4.4)  |
| TH.data      | 1.0-8   | 2017-01-23 | CRAN (R 3.4.0)  |
| tibble       | * 1.4.2 | 2018-01-22 | cran (@1.4.2)   |
| tidyr        | * 0.8.1 | 2018-05-18 | cran (@0.8.1)   |
| tidyselect   | 0.2.4   | 2018-02-26 | cran (@0.2.4)   |
| tidyverse    | * 1.2.1 | 2017-11-14 | CRAN (R 3.4.2)  |
| TMB          | 1.7.12  | 2017-12-11 | CRAN (R 3.4.3)  |
| tools        | 3.4.4   | 2018-03-15 | local           |
| utils        | * 3.4.4 | 2018-03-15 | local           |
| viridisLite  | 0.2.0   | 2017-03-24 | CRAN (R 3.4.0)  |
| withr        | 2.1.0   | 2017-11-01 | CRAN (R 3.4.2)  |
| xml2         | 1.1.1   | 2017-01-24 | CRAN (R 3.4.0)  |

|        |       |            |                |
|--------|-------|------------|----------------|
| xtable | 1.8-2 | 2016-02-05 | CRAN (R 3.4.0) |
| zoo    | 1.8-0 | 2017-04-12 | CRAN (R 3.4.0) |

---
